1 **Dissecting human skeletal stem cell ontogeny by single-cell transcriptomic**

2 **and functional analyses**

3 Jian He<sup>1,\*</sup>, Jing Yan<sup>1,\*</sup>, Jianfang Wang<sup>2,\*</sup>, Liangyu Zhao<sup>3,\*</sup>, Qian Xin<sup>1,\*</sup>, Yang Zeng<sup>4</sup>,

4 Yuxi Sun<sup>5</sup>, Han Zhang<sup>6</sup>, Zhijie Bai<sup>1</sup>, Zongcheng Li<sup>4</sup>, Yanli Ni<sup>4</sup>, Yandong Gong<sup>1</sup>,

5 Yunqiao Li<sup>1</sup>, Han He<sup>1</sup>, Zhilei Bian<sup>7,8</sup>, Yu Lan<sup>7,8</sup>, Chunyu Ma<sup>9</sup>, Lihong Bian<sup>9</sup>, Heng

6 Zhu<sup>10</sup>, Bing Liu<sup>1,4,7,11</sup> & Rui Yue<sup>2</sup>

7 <sup>1</sup> State Key Laboratory of Proteomics, Academy of Military Medical Sciences,

8 Academy of Military Sciences, Beijing 100071, China

9 <sup>2</sup> Institute for Regenerative Medicine, Shanghai East Hospital, Shanghai Key

10 Laboratory of Signaling and Disease Research, Frontier Science Center for Stem

11 Cell Research, School of Life Sciences and Technology, Tongji University, Shanghai

12 200092, China

13 <sup>3</sup> Department of Orthopedics, Changzheng Hospital, Second Military Medical

14 University, Shanghai, 200003, China.

15 <sup>4</sup> State Key Laboratory of Experimental Hematology, Fifth Medical Center of Chinese

16 PLA General Hospital, Beijing 100071, China

17 <sup>5</sup> Department of Cardiology, Shanghai Tenth People's Hospital, Tongji University

18 School of Medicine, Shanghai, 200072, China

19 <sup>6</sup> Department of Transfusion, Daping Hospital, Army Medical University, Chongqing,

20 400042, China

21 <sup>7</sup> Key Laboratory for Regenerative Medicine of Ministry of Education, Institute of

22 Hematology, School of Medicine, Jinan University, Guangzhou 510632, China

23 <sup>8</sup> Guangzhou Regenerative Medicine and Health-Guangdong Laboratory (GRMH-

24 GDL), Guangzhou 510530, China

25 <sup>9</sup> Department of Gynecology, Fifth Medical Center of Chinese PLA General Hospital,

26 Beijing 100071, China

27 <sup>10</sup> Beijing Institute of Radiation Medicine, Beijing 100850, China

28 <sup>11</sup> State Key Laboratory of Experimental Hematology, Institute of Hematology and

29 Blood Diseases Hospital, Chinese Academy of Medical Sciences, Tianjin 300020,

30 China

31 \* These authors contributed equally to this work

32 Correspondence: [zhudingdingabc@163.com](mailto:zhudingdingabc@163.com) (H.Z.); [bingliu17@yahoo.com](mailto:bingliu17@yahoo.com) (B.L.);

33 [ryue@tongji.edu.cn](mailto:ryue@tongji.edu.cn) (R.Y.)

34

35

36

37

38

39

40

41

42

43

44

## 45 **Abstract**

46 Human skeletal stem cells (SSCs) have been discovered in fetal and adult bones.  
47 However, the spatiotemporal ontogeny of human SSCs during embryogenesis has  
48 been elusive. Here we map the transcriptional landscape of human embryonic  
49 skeletogenesis at single-cell resolution to address this fundamental question. We  
50 found remarkable heterogeneity within human limb bud mesenchyme and epithelium,  
51 as well as the earliest osteo-chondrogenic progenitors. Importantly, embryonic SSCs  
52 (eSSCs) were found in the perichondrium of human long bones, which self-renew and  
53 generate osteochondral lineage cells, but not adipocytes or hematopoietic stroma.  
54 eSSCs are marked by the adhesion molecule CADM1 and highly enrich FOXP1/2  
55 transcriptional network. Interestingly, neural crest-derived cells with similar phenotypic  
56 markers and transcriptional network were also found in the sagittal suture of human  
57 embryonic calvaria. Taken together, this study revealed the cellular heterogeneity and  
58 lineage hierarchy during human embryonic skeletogenesis, and identified distinct  
59 skeletal stem/progenitor cells that orchestrate endochondral and intramembranous  
60 ossification.

61

## 62 **Introduction**

63 Multipotent and self-renewing skeletal stem cells (SSCs) were discovered in the  
64 growth plate of early postnatal mice by phenotypic profiling and lineage tracing studies<sup>1</sup>.  
65 <sup>2</sup>. SSCs were also found within PTHrP<sup>+</sup> chondrocytes in the resting zone of mouse  
66 postnatal growth plate<sup>3</sup>, as well as in the periosteum of postnatal long bones and

67 calvaria (also known as periosteal stem cells, PSCs)<sup>4</sup>. Importantly, SSCs were recently  
68 identified in the growth plate of 17-week-old human long bones, suggesting that they  
69 are evolutionarily conserved in human fetus<sup>5</sup>. Similar to bone marrow stromal cells  
70 (BMSCs) that maintain the adult skeleton<sup>6-9</sup>, mouse and human SSCs from the growth  
71 plate give rise to chondrocytes, osteoblasts and hematopoietic stroma upon *in vivo*  
72 transplantation<sup>1, 5</sup>. However, they do not differentiate into adipocytes, highlighting the  
73 functional differences among SSCs at distinct developmental stages and anatomical  
74 sites<sup>10, 11</sup>. Whereas lineage tracing studies in mice revealed multiple waves of  
75 osteoprogenitors during skeletal development<sup>12-14</sup>, the embryonic origin of human  
76 SSCs during skeletogenesis remains unknown. Discovery of an evolutionarily  
77 conserved embryonic SSC population will not only clarify the spatiotemporal ontogeny  
78 of SSCs, but also shed light on novel cell therapies that promote skeletal regeneration.

79 In vertebrates, the earliest progenitors of appendicular skeleton are formed within  
80 limb buds<sup>15, 16</sup>. Limb patterning along the anterior-posterior (AP) axis is regulated by  
81 sonic hedgehog (SHH) signals from the zone of polarizing activity (ZPA)<sup>17</sup>, while the  
82 proximal-distal (PD) axis patterning is mainly regulated by FGF signals from the apical  
83 ectodermal ridge (AER)<sup>18, 19</sup>. The distal mesenchymal cells underlying AER are  
84 undifferentiated and highly proliferative when receiving the FGF and WNT signals<sup>20, 21</sup>,  
85 which form the progress zone that elongates the limb buds. The core mesenchyme  
86 outside progress zone express SOX9 to specify the osteo-chondrogenic lineage and  
87 generate cartilage template. Although different mesenchymal progenitors have been  
88 identified in mouse and chick limb buds<sup>22, 23</sup>, the cellular heterogeneity and lineage

89 hierarchy within human limb buds remain unknown.

90 After chondrogenic differentiation of limb bud mesenchymal progenitors, long bones  
91 are generated by endochondral ossification<sup>24</sup>. Blood vessels invade the center of  
92 cartilage template with perichondrial osteoprogenitors to form the primary ossification  
93 center (POC)<sup>12, 14</sup>, where osteoblasts, vascular endothelial cells, pericytes and  
94 hematopoietic cells populate to form the bone marrow<sup>25-29</sup>. In contrast to long bones,  
95 calvarial bones are generated by intramembranous ossification, which involves cranial  
96 mesenchyme condensation and direct mineralization on top of the cartilage anlagen<sup>30-</sup>  
97 <sup>33</sup>. Whereas long bones are derived from lateral plate mesoderm, calvarial bones are  
98 derived from both neural crest and paraxial mesoderm that generate different parts of  
99 the calvarium<sup>34, 35</sup>. Interestingly, although mouse long bone SSCs and calvarial PSCs  
100 are distinct stem cell populations that mediate endochondral and intramembranous  
101 ossification, respectively, they share similar phenotypic markers (Lineage-  
102 CD51<sup>+/low</sup>Thy1<sup>-</sup>6C3<sup>-</sup>CD200<sup>+</sup>CD105<sup>-</sup>)<sup>1, 4</sup>. Whether the embryonic long bones and  
103 calvaria contain skeletal stem/progenitor cells that share similar molecular features  
104 remain to be explored.

105 Single-cell RNA-sequencing (scRNA-seq) is a powerful tool in dissecting the cellular  
106 composition and lineage hierarchy within heterogeneous or rare cell populations<sup>36-38</sup>.  
107 In the musculoskeletal system, a high-throughput scRNA-seq study during mouse  
108 embryonic development reported the transcriptional landscapes of AER, limb bud  
109 mesenchyme and skeletal muscle before POC formation<sup>39</sup>. Recent scRNA-seq studies  
110 in adult mouse bone marrow also revealed the cellular heterogeneity of BMSCs,

111 endothelial cells and osteo-chondrogenic lineage cells under homeostatic and stress  
112 conditions<sup>40-42</sup>. scRNA-seq profiling during axolotl limb regeneration identified  
113 convergence of connective tissue cells back to multipotent skeletal progenitors that  
114 formed a limb bud-like blastema structure<sup>43</sup>. In contrast, scRNA-seq studies in the  
115 human skeletal system are still lacking, especially during embryonic development.

116 In this study, we generated the first comprehensive human embryonic  
117 skeletogenesis cell atlas by scRNA-seq. By systematically examining the cellular  
118 heterogeneity and lineage hierarchies within multiple skeletal sites, we identified  
119 distinct skeletal stem/progenitor cells in human embryonic long bone and calvarium.

120

## 121 **Results**

### 122 **Integrated analyses of single-cell transcriptomes during limb bud and long** 123 **bone development**

124 To test whether SSCs exist during embryogenesis, we analyzed human limb buds  
125 at 5 weeks post conception (5 WPC), as well as human limb long bones at 8 weeks  
126 post conception (8 WPC). Hematoxylin and eosin staining showed condensed  
127 mesenchyme within limb buds, and the nascent bone marrow cavity (POC) in the  
128 center of long bones (Fig. 1a). To map the single-cell transcriptomes, upper and lower  
129 limb buds (5 WPC, n=3, Supplementary information, Fig. S1a), as well as forelimb and  
130 hindlimb long bones (8 WPC, n=3, Supplementary information, Fig. S1a) were  
131 dissected and subjected to enzymatic digestions. Dissociated cells were then sorted  
132 by flow cytometry to obtain live single cells for 3' scRNA-seq on a 10X Genomics

133 platform (Fig. 1b). After quality control and doublet exclusion, we obtained 19,890  
134 single cells in 5 WPC limb buds and 15,680 single cells in 8 WPC long bones  
135 (Supplementary information, Fig. S1a). On average, we detected 2,841 genes (10,212  
136 unique molecular identities, UMI) per cell with less than 2.4% mitochondrial genes  
137 (Supplementary information, Fig. S1a). Normal karyotype was inferred by calculating  
138 copy number variation (CNV) scores on 100 randomly sampled cells for each embryo  
139 (Supplementary information, Fig. S1b)<sup>44</sup>. We performed canonical correlation analysis  
140 (CCA) to normalize variance and correct batch effects among different samples<sup>45</sup>.  
141 Integrated analysis of the limb bud and long bone samples revealed 16 subsets (Fig.  
142 1c and Supplementary information, Fig. S1c). The robustness of cell clustering was  
143 validated by calculating silhouette values (Supplementary information, Fig. S1d)<sup>46</sup>, and  
144 by random sampling and re-clustering analysis (Supplementary information, Fig. S1e).

145 We found three *PRRX1*<sup>+</sup> mesenchymal subsets that mainly exist in 5 WPC limb buds  
146 (clusters 1-3), which differentially expressed *PDGFRA*, reflecting mesenchymal  
147 progenitors at different maturation stages (Fig. 1c-e)<sup>22</sup>. Notably, cluster 4 is a  
148 mesenchymal subset that equally distributed between limb bud and long bone samples,  
149 which expressed *PRRX1*, low level of *SOX9* and the highest level of *PDGFRA*,  
150 reminiscent of osteo-chondrogenic progenitors (OCPs) that give rise to long bones (Fig.  
151 1c-e)<sup>22</sup>. *EPCAM*<sup>+</sup> epithelial cells (clusters 14 and 15)<sup>47</sup> and *GYPA*<sup>+</sup> erythrocytes (cluster  
152 13)<sup>48</sup> were mainly detected in limb buds, while *SIX1*<sup>+</sup> myoprogenitors (cluster 9)<sup>49</sup>,  
153 *CDH5*<sup>+</sup> endothelial cells (cluster 11)<sup>50</sup> and *CD68*<sup>+</sup> macrophages (cluster 12)<sup>51</sup> were  
154 found in both samples (Fig. 1c-e). In contrast, *RUNX2*<sup>+</sup> osteoprogenitors (cluster 5)<sup>52</sup>,

155 OSR2<sup>+</sup>NOV<sup>+</sup> perichondrial mesenchymal stromal cells (PMSCs, cluster 6)<sup>53, 54</sup>, SOX9<sup>+</sup>  
156 chondroblasts and chondrocytes (clusters 7 and 8)<sup>55</sup>, MYOG<sup>+</sup> myocytes (cluster 10)<sup>56</sup>,  
157 as well as SOX10<sup>+</sup> Schwann cells (cluster 16)<sup>57</sup> were mainly detected in long bones  
158 (Fig. 1c-e and Supplementary information, Table S1).

159 Pearson correlation analysis clearly distinguished the skeletogenic and non-  
160 skeletogenic subsets (Supplementary information, Fig. S1f). Pseudotime analysis by  
161 RNA velocity<sup>58</sup> showed a differentiation continuum from limb bud mesenchymal  
162 progenitors to OCPs, followed by cell fate specification into osteogenic and  
163 chondrogenic lineages (Fig. 1f). Partition-based graph abstraction (PAGA) analysis<sup>59</sup>  
164 showed a pivotal role of OCPs in linking limb bud mesenchymal progenitors (PRRX1<sup>+</sup>)  
165 to PMSC/chondroblasts/chondrocytes (SOX9<sup>+</sup>) and osteoprogenitors (RUNX2<sup>+</sup>) in  
166 embryonic long bones (Fig. 1g). Next, we focused on this OCP lineage and separately  
167 analyzed the limb bud and long bone samples to trace back the origin of SSCs.

168

### 169 **Delineating mesenchymal lineage specification during limb bud development**

170 We were able to identify 10 subsets in 5 WPC human limb buds (Fig. 2a).  
171 Hierarchical analysis within the 4 mesenchymal subsets showed that Mes1 (cluster 1)  
172 clustered with Mes2 (cluster 2), while Mes3 (cluster 3) and OCP (cluster 4) clustered  
173 together (Fig. 2b). Of the two epithelial subsets, only cluster 9 highly expressed AER  
174 marker *FGF8* (Fig. 1d), consistent with previous study in mouse embryos (Fig. 2b)<sup>39</sup>.  
175 Surprisingly, PAGA analysis found a strong correlation between Mes2 and epithelial  
176 subsets (Fig. 2c), raising the possibility that Mes2 might correspond to progress zone



177 mesenchyme that lies underneath the limb bud epithelium<sup>16, 60</sup>. Consistent with this  
178 hypothesis, cell cycle analysis showed that Mes2 was more proliferative as compared  
179 to other mesenchymal subsets, with more cells in G2/M phase (Fig. 2d). Gene ontology  
180 (GO) analysis showed that Mes2 enriched genes regulating metabolic processes,  
181 while Mes3 and OCP enriched genes involved in embryonic skeletal development and  
182 ossification (Fig. 2e).

183 During limb bud outgrowth, *HOX* gene expressions switch from 3' to 5' topologically  
184 associating domains along the PD axis<sup>61</sup>. We found that Mes3 preferentially expressed  
185 3' *HOX* genes such as *HOX2-6*, while Mes1 and Mes2 preferentially expressed 5' *HOX*  
186 genes such as *HOX9-11*, suggesting that they represented proximal (Mes3) and distal  
187 (Mes1 and Mes2) mesenchymal cells, respectively (Fig. 2f). In contrast, OCP  
188 expressed both 3' and 5' *HOX* genes, reminiscent of the core mesenchyme that gives  
189 rise to skeletal tissues (Fig. 2f). Consistent with this, when we aligned the  
190 mesenchymal subsets along PD and AP axes using known marker genes such as  
191 *MEIS2*, *IRX3*, *HOXD13* and *SHH* (Fig. 2g), Mes3 and OCP were positioned at the  
192 proximal end, while Mes1 and Mes2 were positioned at the distal end (Fig. 2g). Of note,  
193 the distal most localization of Mes2 was in line with the progress zone. Consistent with  
194 previous studies<sup>62, 63</sup>, gene set variation analysis (GSVA) showed that the proximal and  
195 core mesenchyme enriched genes related to retinoic acid and PDGF signaling, while  
196 the distal mesenchyme enriched genes related to Hedgehog, FGF, TGF $\beta$  and Notch  
197 signaling (Fig. 2h). To explore the gene regulatory networks (regulons) that determine  
198 cell fate specification in the mesenchymal subsets, we applied single-cell regulatory

199 network inference and clustering (SCENIC) method to score the activity of regulons by  
200 an AUCell algorithm (AUC score), which reflects the co-expression of transcription  
201 factors (TFs) and their downstream target genes in each individual cell<sup>64</sup>. Hierarchical  
202 clustering of the AUC scores again distinguished proximal/core and distal  
203 mesenchymal subsets (Fig. 2i). MSX1 and PITX1 regulons were enriched in Mes1 and  
204 Mes2<sup>65, 66</sup>, while PBX1 and SOX9 regulons were enriched in Mes3 and OCP<sup>22, 67</sup>.  
205 Interestingly, we also identified several OCP-specific regulons such as ZMIZ1, NR2C2  
206 and KDM4A, suggesting novel chondrogenic regulators within the limb bud  
207 mesenchyme (Fig. 2i and Supplementary information, Table S2).

208 To explore evolutionarily conserved and species-specific features during limb bud  
209 development, we analyzed a recently published scRNA-seq dataset of mouse hindlimb  
210 buds at similar embryonic stage (E11.5) (Supplementary information, Fig. S2a)<sup>68</sup>.  
211 SciBet is a recently developed algorithm that predicts cell identity by training  
212 multinomial model with given dataset<sup>69</sup>. By training SciBet with our human dataset, we  
213 found that most human subsets were conserved in mouse except that Mes2 and  
214 epithelium (non-AER) subsets were not predicted in mouse limb buds (Supplementary  
215 information, Fig. S2b and Table S1). The lack of a highly proliferative Mes2 subset  
216 implied advanced maturation of E11.5 mouse limb buds (Supplementary information,  
217 Fig. S2a)<sup>70</sup>. Consistent with this, mouse OCP subset highly expressed SOX9  
218 (Supplementary information, Fig. S2c), suggesting early chondrogenic differentiation.  
219 A much lower proportion of mouse AER was found within limb bud epithelium (6%) as  
220 compared to human AER (69%, Supplementary information, Fig. S2d), which could

221 possibly explain why mouse limbs are much shorter than human limbs.

222 Taken together, these data revealed the cellular heterogeneity and species-specific  
223 features of human limb bud mesenchyme and epithelium. Since osteogenesis is not  
224 initiated in 5 WPC human limb buds, we went on to analyze the 8 WPC human long  
225 bones in search of embryonic SSCs.

226

### 227 **Delineating osteochondral lineage specification during long bone development**

228 We analyzed the long bone dataset from 8 WPC human embryos (Supplementary  
229 information, Fig. S3a) and divided the osteochondral lineage cells (OCLCs) into 7  
230 subsets (Fig. 3a). In addition to previously identified osteoprogenitor, PMSC,  
231 chondroblast and chondrocyte subsets (Fig. 3a, clusters 4-7), long bone OCPs (Fig.  
232 1c) were subdivided into 3 subsets (clusters 1-3). Cluster 1 highly expressed *CXCL12*  
233 and *PDGFRA* (Supplementary information, Fig. S3b and Table S1), which are markers  
234 of BMSCs<sup>28, 71</sup>. Cluster 2 highly expressed *TWIST2* that functions as an inhibitor of  
235 osteoblastic differentiation<sup>72</sup>, reminiscent of OCPs that were derived from limb bud  
236 mesenchyme. Cluster 3 highly expressed *GAS2*, *PTN* and localized in the center of all  
237 OCLC subsets (Fig. 3a, Supplementary information, Fig. S3a,b and Table S1). GO  
238 analysis showed significant enrichment of genes related to organ and appendage  
239 morphogenesis in clusters 1-3 (Fig. 3b). Interestingly, genes related to stem cell  
240 proliferation were enriched in cluster 3 (Fig. 3b), suggesting it might contain embryonic  
241 SSCs (eSSCs).

242 To test this hypothesis *in silico*, pseudotime analysis by RNA velocity was performed

243 to explore the lineage relationships among OCLC subsets (Fig. 3c). We observed  
244 strong directional streams from eSSC toward osteoprogenitor,  
245 chondroblast/chondrocyte and PMSC subsets (Fig. 3c). Interestingly, OCP was  
246 upstream of both eSSC and BMSC, which formed two differentiation trajectories to  
247 generate the skeleton and bone marrow stroma, respectively (Fig. 3c). Diffusion map  
248 analysis of OCP, eSSC, chondroblast/chondrocyte and osteoprogenitor subsets  
249 simulated two differentiation trajectories featuring chondrogenesis and osteogenesis  
250 (Fig. 3d). Consistent with the RNA velocity analysis, eSSC was located at the  
251 branching point of osteogenesis and chondrogenesis (Fig. 3d). We set OCP as the  
252 root to identify temporally expressed genes over pseudotime, and found that genes  
253 highly expressed in OCPs (eg. *PITX1*, *HOXA10*, *CRABP1*, *CD24*) and eSSCs (eg.  
254 *GAS1/2*, *SOX4* and *SFRP2*) were gradually down-regulated, while genes that highly  
255 expressed in chondrocytes (eg. *CNMD*, *EPYC*, *COL9A2*, *COL11A2*) and  
256 osteoprogenitors (eg. *DLX5*, *CDH11*, *OGN* and *COL1A1/2*) were up-regulated upon  
257 terminal differentiation (Fig. 3e). SCENIC analysis showed that eSSCs highly enriched  
258 regulons such as FOXP1 and FOXP2 (Fig. 3f and Supplementary information, Table  
259 S2). The FOXP1 regulon seemed to be more specific to eSSCs, as the FOXP2 regulon  
260 was also enriched in OCPs and osteoprogenitors (Fig. 3g). Nevertheless, FOXP1/2  
261 did share a significant amount of target genes in eSSCs (Fig. 3h).

262 We also analyzed a published scRNA-seq dataset of mouse hindlimb long bones at  
263 similar embryonic stage (E15.5) (Supplementary information, Fig. S3c,d)<sup>68</sup>. SciBet  
264 analysis found that human eSSC was evolutionarily conserved in mouse long bones

265 (Supplementary information, Fig. S3e). Interestingly, FOXP1/2/4 regulons were highly  
266 enriched in mouse eSSCs (Supplementary information, Fig. S3f,g and Table S2),  
267 suggesting a fundamental role of FOXP family TFs in regulating eSSC specification.  
268 Taken together, we identified an eSSC subset among OCPs that could potentially  
269 regulate long bone development and POC formation.

270

### 271 **Identification of *CADM1* as a phenotypic marker of eSSC**

272 To prospectively isolate eSSCs for functional validation *ex vivo*, we first screened for  
273 cell surface markers that were differentially expressed among long bone OCLC  
274 subsets. Interestingly, we found the cell adhesion molecule *CADM1* to be preferentially  
275 expressed in eSSCs (Fig. 4a). SCENIC analysis showed that FOXP1/2 binding motifs  
276 were highly enriched in the predicted cis-regulatory elements of *CADM1* among all co-  
277 expressed target genes (Fig. 3h), suggesting that it could be used as a legitimate  
278 phenotypic marker of eSSCs. Since *CADM1* was also expressed in Schwann cells (Fig.  
279 4a), we sought to further enrich eSSCs by combining with previously reported SSC  
280 and BMSC markers (Fig. 4a)<sup>1, 5, 11</sup>, and found that *PDPN* was differentially expressed  
281 in eSSCs (*PDPN*<sup>+</sup>) and Schwann cells (*PDPN*<sup>-</sup>) (Fig. 4a). Immunostaining of *CADM1*  
282 and *PDPN* on 8 WPC human long bone sections showed that *PDPN*<sup>+</sup>*CADM1*<sup>+</sup> cells  
283 mainly localize in the perichondrium surrounding POC and articular surface (Fig. 4b  
284 and Supplementary information, Fig. S4b), indicating their ability to generate  
285 chondrocytes and PMSCs. A few *PDPN*<sup>+</sup>*CADM1*<sup>+</sup> cells were also found inside POC  
286 (Fig. 4b), reminiscent of osteoprogenitors that invade the cartilage template<sup>12</sup>.

287 *In silico* transcript-averaged cell scoring (TACS) analysis<sup>73</sup> revealed that the purity  
288 of eSSCs could be further enriched by PDGFRA<sup>low/-</sup>PDPN<sup>+</sup>CADM1<sup>+</sup> cells among OCLC  
289 subsets (Supplementary information, Fig. S4a). In contrast, *THY1* (CD90), *NGFR*  
290 (CD271), *MCAM* (CD146) or *NT5E* (CD73) were hardly detected in eSSCs (Fig. 4a  
291 and Supplementary information, Fig. S4a). Next, we sorted PDGFRA<sup>low/-</sup>PDPN<sup>-</sup>,  
292 PDGFRA<sup>low/-</sup>PDPN<sup>+</sup>CADM1<sup>-</sup> and PDGFRA<sup>low/-</sup>PDPN<sup>+</sup>CADM1<sup>+</sup> cells from 8 WPC  
293 human long bones by flow cytometry (Fig. 4c), and performed colony-forming unit-  
294 fibroblast (CFU-F) and mesenchymal sphere cultures to assess their colony- and  
295 sphere-forming efficiencies *ex vivo*. As compared to PDGFRA<sup>low/-</sup>PDPN<sup>-</sup> cells,  
296 PDGFRA<sup>low/-</sup>PDPN<sup>+</sup>CADM1<sup>-</sup> cells showed significantly increased colony-forming  
297 efficiency with colonies of larger size (Fig. 4d,e). Remarkably, PDGFRA<sup>low/-</sup>-  
298 PDPN<sup>+</sup>CADM1<sup>+</sup> cells showed an even higher colony-forming efficiency with  
299 significantly more colonies of larger size as compared to PDGFRA<sup>low/-</sup>PDPN<sup>-</sup> and  
300 PDGFRA<sup>low/-</sup>PDPN<sup>+</sup>CADM1<sup>-</sup> cells (Fig. 4d,e). Mesenchymal sphere formation analysis  
301 showed similar results (Supplementary information, Fig. S4c,d), suggesting that  
302 eSSCs highly enrich clonogenic activity.

303

#### 304 **eSSCs self-renew and undergo osteo-chondrogenic differentiation**

305 To test the self-renewal and differentiation potentials of eSSCs, we sorted  
306 PDGFRA<sup>low/-</sup>PDPN<sup>+</sup>CADM1<sup>+</sup> cells to perform serial CFU-F colony formation assay, as  
307 well as trilineage differentiation (adipogenic, osteogenic and chondrogenic) both *in*  
308 *vitro* and *in vivo*. Single CFU-F colonies formed by flow cytometrically sorted

309 PDGFRA<sup>low/-</sup>PDPN<sup>+</sup>CADM1<sup>+</sup> cells were clonally expanded and serially passaged,  
310 which could generate secondary and tertiary colonies that maintain eSSC  
311 immunophenotypes (Fig. 5a and Supplementary information, Fig. S5a). Next, we  
312 performed *in vitro* trilineage differentiation of nonclonal and clonal cultures (cells were  
313 clonally expanded from single CFU-F colonies) of PDGFRA<sup>low/-</sup>PDPN<sup>+</sup>CADM1<sup>+</sup> cells,  
314 and found that they underwent osteogenic and chondrogenic differentiation, but not  
315 adipogenic differentiation (Fig. 5b, and Supplementary information, Fig. S5b,c). The  
316 differentiation efficiency was quantified by qPCR analysis of adipogenic (*ADIPOQ* and  
317 *PPARG*), osteogenic (*RUNX2* and *SP7*) and chondrogenic (*SOX9* and *COL2A1*)  
318 marker genes (Fig. 5c and Supplementary information, Fig. S5d).

319 To test the differentiation potential of eSSCs *in vivo*, we performed renal  
320 subcapsular transplantation of cultured PDGFRA<sup>low/-</sup>PDPN<sup>+</sup>CADM1<sup>+</sup> cells in  
321 immunodeficient mice. Eight weeks after transplantation, the subcapsular grafts were  
322 harvested and sectioned. Movat pentachrome staining and immunofluorescent  
323 staining of collagen I and II revealed osteo-chondrogenic differentiation of eSSCs (Fig.  
324 5d). We did not observe bone marrow formation in the subcapsular grafts, suggesting  
325 that eSSCs are functionally distinct from growth plate SSCs that could organize a  
326 hematopoietic microenvironment<sup>5</sup>. Taken together, these data suggested that CADM1  
327 is an important phenotypic marker of eSSCs, and that PDGFRA<sup>low/-</sup>PDPN<sup>+</sup>CADM1<sup>+</sup>  
328 cells enriched self-renewing eSSCs that generate the osteochondral lineages during  
329 long bone development.

330

### 331 **Delineating osteogenic lineage specification during calvaria development**

332 To test whether similar skeletal stem/progenitor cells exist in embryonic calvarium,  
333 we performed scRNA-seq in 8 WPC human calvaria (n=2, Supplementary information,  
334 Fig. S6a). Analysis of 7,287 CD235A<sup>-</sup> 7AAD<sup>-</sup> (live non-erythrocytes) single cells  
335 revealed 12 distinct subsets (Fig. 6a), which included: 1) NGFR<sup>+</sup> cranial neural crest  
336 (NC) cells (cluster 1) that highly expressed *NES*<sup>74</sup>; 2) Two GJA1<sup>+</sup> subsets including  
337 vascular leptomenigeal cells (cluster 2, VLMCs) that highly expressed *SLC6A13* and  
338 *PTGDS*<sup>75</sup>, and migratory NC (mig\_NC) cells that expressed higher level of *BMP4*  
339 (cluster 3)<sup>76, 77</sup>; 3) Neural crest-derived cells (cluster 4, NCDC) that highly expressed  
340 *BMP4* and *FOXC2*<sup>78</sup>; 4) RUNX2<sup>+</sup> osteoprogenitors (cluster 5) that highly expressed  
341 osteogenic factors *DLX5* and *CLEC11A*<sup>79, 80</sup>; 5) Two OSR2<sup>+</sup> PMSC subsets (clusters 6  
342 and 7) that highly expressed *POSTN*; 6) SOX9<sup>+</sup> chondrocytes that highly expressed  
343 *COL9A2* (cluster 8); 7) PDGFRB<sup>+</sup> pericytes that highly expressed *MCAM* and *ACTA2*;  
344 8) MYF5<sup>+</sup> myoblasts; 9) CDH5<sup>+</sup> endothelial cells and 10) CD68<sup>+</sup> macrophages (Fig.  
345 6a,b, Supplementary information, Table S1).

346 As compared to 8 WPC long bones, higher proportion of osteoprogenitors and  
347 PMSCs but much lower proportion of chondrocytes were detected in 8 WPC calvarial  
348 bones (Supplementary information, Fig. S6b), highlighting the fundamental differences  
349 between endochondral and intramembranous ossification<sup>15</sup>. Spearman correlation  
350 analysis showed that calvarial chondrocyte and osteoprogenitor subsets were more  
351 correlated with their long bone counterparts (Fig. 6c), while the PMSC2 subset seemed  
352 to be closely related to OCP and BMSC subsets in long bones (Fig. 6c). Integrated



353 analysis of all subsets at the pseudo-bulk level showed similar results (Supplementary  
354 information, Fig. S6c). Although no calvarial subset highly resembled long bone eSSC  
355 at the transcriptome level, we did notice that NCDC shared similar phenotypic markers  
356 as long bone eSSC (PDGFRA<sup>low/-</sup>PDPN<sup>+</sup>CADM1<sup>+</sup>) (Fig. 6d). Immunostaining on 8  
357 WPC human calvarial sections showed PDPN<sup>+</sup>CADM1<sup>+</sup> cells in the outer layer of  
358 sagittal suture (Supplementary information, Fig. S6d), reminiscent of PSCs in adult  
359 mouse calvarium<sup>4</sup>.

360 To predict the functional role of NCDC during calvarial bone development, we  
361 performed pseudotime analysis within osteogenic subsets by Slingshot<sup>81</sup>, which  
362 revealed two distinct differentiation trajectories (Fig. 6e). Specifically, the FOXC1<sup>+</sup> NC  
363 lineage cells and TWIST2<sup>+</sup> mesodermal lineage cells converge to generate DLX5<sup>+</sup>  
364 osteoprogenitors (Fig. 6e), where NCDC seemed to play a pivotal role in the transition  
365 from migratory NC cells to osteoprogenitors (Fig. 6e). Gene expression analysis  
366 showed that NC lineage cells down-regulated neural genes such as *NGFR*, *NES* and  
367 *CLDN11*<sup>82</sup> to generate NCDCs and osteoprogenitors (Fig. 6f). In contrast, mesodermal  
368 lineage cells down-regulated WNT signaling genes such as *WNT2* and *WNT2B*, as  
369 well as TFs like *MEOX2*, *OSR1* and *OSR2* to generate osteoprogenitors (Fig. 6f).  
370 Calvarial osteoprogenitors highly expressed *COL1A1*, *PRRX2* and *CLEC11A*, a  
371 recently identified osteogenic factor that promotes the maintenance of adult skeleton<sup>80</sup>.  
372 <sup>83</sup>. GSVA analysis showed that EPH-EPHRIN, WNT-LPR6 and RAC1 activation  
373 pathways were enriched in NCDCs (Supplementary information, Fig. S6e). Similar to  
374 long bone eSSC, SCENIC analysis showed that FOXP1/2 regulons were highly

375 enriched in NCDC (Fig. 6g,h, Supplementary information, Fig. S6g and Table S2),  
376 although little FOXP1/2 target genes were shared by these two subsets (Fig. 3h and  
377 Supplementary information, Fig. S6f). In addition, the FOXP4 regulon was also  
378 enriched in NCDC and formed an integrated transcriptional network with FOXP1/2,  
379 suggesting a fundamental role of FOXP family TFs in NCDC specification. Taken  
380 together, these data revealed two distinct routes of osteogenic differentiation in calvaria,  
381 and identified NCDC as a potential skeletal stem/progenitor cell subset that mediates  
382 intramembranous ossification during calvarial development.

383

## 384 **Discussion**

385 Whereas skeletogenesis has been extensively studied in model organisms such as  
386 mouse, chick and axolotl<sup>39, 43, 68, 84</sup>, human studies largely remain at the  
387 histomorphological level. In 2018, Ferguson et al. interrogated 17 WPC human fetal  
388 musculoskeletal subsets by bulk RNA-seq and compared chondrocyte features among  
389 4 developmental stages<sup>85</sup>. Recently, a human skeletal muscle atlas was reported  
390 during embryonic, fetal and postnatal development<sup>86</sup>. Here, we provide the first  
391 transcriptional landscape of human embryonic skeletogenesis at single-cell resolution  
392 and shed light on novel skeletal stem/progenitor cells orchestrating lineage  
393 specifications during endochondral and intramembranous ossification. Together with  
394 the previous studies, we are now approaching a better understanding of the ontogeny  
395 of human musculoskeletal system.

396 Human SSCs were originally found in fetal long bones, which could be prospectively

397 isolated by a combination of phenotypic markers (Lin<sup>-</sup>PDPN<sup>+</sup>CD146<sup>-</sup>CD73<sup>+</sup>CD164<sup>+</sup>)<sup>5</sup>.  
398 To test whether human SSCs exist during embryonic development, we mapped the  
399 single-cell transcriptomes in 5 WPC human limb buds and 8 WPC embryonic long  
400 bones and found an OCP subset that tightly links limb bud mesenchyme to  
401 endochondral ossification (Fig. 1f,g). Unlike mouse limb bud mesenchymal progenitors  
402 (Sox9<sup>+</sup>Pdgfra<sup>hi</sup>) and OCPs (Sox9<sup>+</sup>Pdgfra<sup>hi</sup>)<sup>22</sup>, human OCPs are SOX9<sup>low</sup>PDGFRA<sup>hi</sup> (Fig.  
403 1d), suggesting that they are less differentiated than mouse OCPs. We then focused  
404 on OCPs in both limb buds and long bones in order to identify skeletal stem/progenitor  
405 cells during human embryonic limb development.

406 Although the patterning mechanisms during limb bud development have been well-  
407 studied and simulated by different models<sup>15, 17, 19</sup>, the heterogeneity of human limb buds  
408 has been elusive. We identified 4 mesenchymal and 2 epithelial subsets in 5 WPC  
409 human limb buds. By analyzing *Hox* gene expression and well-known marker genes,  
410 we were able to align the 4 mesenchymal subsets along PD and AP axes (Fig. 2f,g).  
411 Importantly, we identified a highly proliferative Mes2 subset at the distal most  
412 mesenchyme, implicating immature mesenchymal progenitors underlying AER<sup>21, 65</sup>.  
413 We also identified an OCP subset with chondrogenic potential in the core mesenchyme.  
414 As compared to human limb buds, the E11.5 mouse limb buds lacked an equivalent  
415 Mes2 subset, showed early chondrogenic differentiation of OCP, and contained fewer  
416 proportion of AER cells (Supplementary information, Fig. S2). Together, these data  
417 suggested greater potential of human limb bud outgrowth that could possibly contribute  
418 to longer limb bones. Whether the novel regulons identified in human limb bud OCP

419 (eg. ZMIZ1, NR2C2 and KDM4A) critically control chondrogenic differentiation remains  
420 to be validated by functional studies.

421 The OCPs in 8 WPC human long bones could be subdivided into 3 subsets, namely,  
422 OCP, BMSC and eSSC. The long bone OCP subset could be derived from limb bud  
423 OCPs, which generate BMSCs and eSSCs to form the bone marrow stroma and  
424 appendicular skeleton, respectively (Fig. 3c). Similar to human SSCs<sup>5</sup>, eSSCs were  
425 predicted to generate chondroblasts/chondrocytes, osteoprogenitors and PMSCs in 8  
426 WPC long bones (Fig. 3c). Interestingly, PAGA analysis of integrated samples revealed  
427 a critical role of PMSC in mediating chondrogenic differentiation (Fig. 1g), which was  
428 not reflected by RNA velocity analysis in long bones (Fig. 3c). This discrepancy could  
429 be explained by the fact that RNA velocity analysis is more suitable for predicting  
430 differentiation trajectories in full-length sequencing dataset<sup>87</sup>. Since PMSC expressed  
431 higher level of SOX9 as compared to eSSC (Supplementary information, Fig. S3b), we  
432 tend to believe that PMSC also contributes to chondrogenic differentiation. Importantly,  
433 an equivalent eSSC subset was also found in E15.5 mouse embryonic long bones  
434 (Supplementary information, Fig. S3), suggesting its evolutionary conservation. The  
435 fact that both human and mouse eSSCs enriched FOXP1/2 regulons was quite  
436 intriguing (Fig. 3i), since mouse *Foxp1/2/4* have been previously shown to regulate  
437 endochondral ossification by promoting chondrocyte proliferation and inhibiting  
438 osteoblast differentiation<sup>88</sup>. They do so by interacting with Runx2 to repress its  
439 transcriptional activity<sup>88</sup>, which could possibly explain how eSSCs are maintained in an  
440 undifferentiated state. Notably, much more FOXP2 target genes were found in human

441 long bones as compared to mouse (human: 97, mouse: 12), consistent with a recent  
442 discovery that skeletal FOXP2 contributes to the acquisition of important human traits  
443 such as language and bipedalism<sup>89</sup>. More functional studies are needed to fully  
444 address the molecular mechanisms by which FOXP1/2 regulate human eSSC self-  
445 renewal and differentiation.

446 CADM1 was previously identified as an osteoblastic adhesion molecule and a  
447 diagnostic marker for osteosarcoma<sup>90</sup>. Here we found that PDPN<sup>+</sup>CADM1<sup>+</sup> cells  
448 enriched eSSCs in 8 WPC human long bones, which mainly localize in the  
449 perichondrium surrounding POC and articular surface (Supplementary information, Fig.  
450 S4b). Interestingly, the perichondrial localization of eSSC was consistent with the  
451 expression pattern of *Foxp1/2/4* in E13.5 mouse perichondrium<sup>88</sup>. A few  
452 PDPN<sup>+</sup>CADM1<sup>+</sup> cells were also found inside the developing POC, which might  
453 represent invading osteoprogenitors derived from eSSCs<sup>12</sup>. Similar to human SSCs,  
454 eSSCs exhibit high clonogenic capacity, which self-renew and undergo osteochondral  
455 but not adipogenic differentiation *in vitro* and *in vivo*<sup>5</sup>. Notably, eSSCs do not form bone  
456 marrow upon renal subcapsular transplantation, suggesting that skeletogenic and  
457 hematopoietic functions might be segregated between eSSCs and BMSCs (Fig. 3c).  
458 However, whether the BMSC subset could support hematopoiesis in 8 WPC human  
459 embryo is still elusive, since fetal liver is the primary hematopoietic site at this  
460 embryonic stage<sup>91</sup>. Another possibility could be that cultured eSSCs lose their ability  
461 to support hematopoiesis<sup>92, 93</sup>. We were not able to transplant uncultured eSSCs due  
462 to limited number of cells we could obtain in 8 WPC human long bones. Future

463 optimization of the transplantation protocol is needed to further dissect the *in vivo*  
464 functions of human and mouse eSSCs. Furthermore, genetic lineage tracing studies  
465 would help elucidating the relationship among eSSCs, growth plate SSCs and long  
466 bone PSCs in mouse models.

467 In contrast to endochondral ossification in long bones, intramembranous ossification  
468 is the primary way by which calvaria develop<sup>31</sup>. We found 7 osteogenic subsets in 8  
469 WPC calvaria and predicted two distinct sources of osteoprogenitors: 1) from cranial  
470 NC lineage cells and 2) from mesodermal lineage cells<sup>94</sup>. Interestingly, we identified a  
471 NCDC subset in calvaria that shared similar phenotypic markers as long bone eSSC  
472 (Fig. 6d), which represented a transitional state between migratory NC cells and  
473 osteoprogenitors. The fact that FOXP1/2 regulons were highly enriched in both long  
474 bone eSSCs and calvarial NCDCs suggested a fundamental role of FOXP1/2 in both  
475 endochondral and intramembranous ossification. Consistent with this, mouse *Foxp1/2*  
476 were detected in skeletal progenitors during craniofacial bone development<sup>95</sup>. Unlike  
477 long bone eSSCs, NCDCs do not seem to generate chondrocytes (Fig. 6a and  
478 Supplementary information, Fig. S6c), which was characteristic of intramembranous  
479 ossification. Future studies are needed to test whether NCDCs are evolutionarily  
480 conserved in mouse embryonic calvarium, and to prospectively isolate NCDCs for  
481 functional analysis of their stem cell activities. Furthermore, the relationships between  
482 embryonic NCDCs and calvarial PSCs in postnatal mice could be addressed by  
483 genetic lineage tracing studies<sup>4</sup>.

484 Given that the skeleton repairs in a way that largely recapitulates embryonic

485 development, the skeletogenic mechanisms we uncovered here might help developing  
486 novel cell therapies to promote bone and cartilage regeneration, which could ultimately  
487 lead to treatments of skeletal disorders such as non-union fracture, osteoporosis and  
488 craniofacial defects.

489

## 490 **Materials and Methods**

### 491 **Human embryonic sample collection.**

492 Healthy human embryonic samples were obtained with elective medical termination of  
493 pregnancy in the Academy of Military Medical Sciences (the Fifth Medical Center of  
494 the PLA General Hospital). All human studies were conducted in accordance with the  
495 official ethical guidelines and protocols approved by the Ethics Committee of the  
496 Affiliated Hospital of Academy of Military Medical Sciences (ky-2017-3-5). The written  
497 informed consent was obtained from all participants before sample collection. Days  
498 post fertilization (dpf) of embryos were determined according to the measurement of  
499 crown-rump length (CRL) and number of somite pairs, and staged into 5 and 8 weeks  
500 post conception (WPC)<sup>96</sup>. The gender of embryos used for scRNA-seq was identified  
501 based on the expression of XIST (female) and RPS4Y1 (male)<sup>97</sup>. Sample information  
502 was summarized in Supplementary information, Fig. S1a and 6a. The morphology of  
503 the embryonic limb bud and long bone was assessed by Hematoxylin-Eosin Staining  
504 Kit (Fig. 1a).

505

### 506 **Mice.**

507 NOG (NOD.Cg-Prkdc<sup>scid</sup>Il2rg<sup>tm1Sug</sup>/JicCr1) immunodeficient mice (Beijing Vital River  
508 Laboratory Animal Technology Co., Ltd.) were used as recipients for renal subcapsular  
509 transplantation of human eSSCs. All procedures and protocols were approved by the  
510 Ethics Committee of the Academy of Military Medical Sciences (the Fifth Medical  
511 Center of the PLA General Hospital).

512

513 **Preparation of single-cell suspensions from human limb buds and long bones.**

514 Human embryonic limb buds were isolated and transferred to IMDM medium (Gibco)  
515 containing 10% fetal bovine serum (FBS) (HyClone) on ice. The tissues were washed  
516 with phosphate-buffered saline (PBS) and transferred to pre-warmed digestion  
517 medium containing 0.1 g/mL Collagenase I (Sigma) and 0.1 g/mL Collagenase II  
518 (Sigma). After vigorous shaking, the samples were incubated at 37 °C for 30 min with  
519 gentle shaking every 5 mins. Digestion was terminated by adding IMDM medium  
520 containing 10% FBS. After centrifugation at 350 g for 6 min, collected cells were  
521 resuspended in FACS sorting buffer (1 x PBS with 1% BSA) for subsequent staining.  
522 For long bone specimens, forelimbs and hindlimbs were dissected to obtain humeri,  
523 ulnae, radii, femurs, tibiae and fibulae. For calvarial bone specimens, frontal bones,  
524 parietal bones and occipital bones were dissected. After cutting by scissors, the long  
525 bones or calvarial bones were enzymatically digested as described above. The  
526 digested tissues were filtrated with 40 µm strainer to remove cartilage or bone chips,  
527 after which cells were centrifugated and resuspended in FACS sorting buffer. The  
528 viability of cells was 80-90% by trypan blue staining (0.4%) and 70-80% by 7-AAD



529 staining.

530

531 **Flow cytometry.**

532 The following antibodies were used: CD45-APC-Cy7 (BD, 557833, 1:50), CD31-Biotin  
533 (eBioscience, 13-0319-82, 1:50), Steptavidin-APC-eFlour780 (eBioscience, 47-4317-  
534 82, 1:100), CD235a-APC-Cy7 (Biolegend, 349116, 1:50), CD140a-BB515 (BD,  
535 564594, 1:50), PDPN-APC (eBioscience, 17-9381-41, 1:50) and CADM1-PE (MBL,  
536 CM004-5, 1:50). Cells were stained in sorting buffer (PBS+1% BSA) for 30 min at 4 °C,  
537 washed once and resuspended in sorting buffer with 7-AAD (eBioscience, 00-6993-50,  
538 1:50) as live cell dye. Flow cytometry was performed on BD FACS Aria II. Pre-gating  
539 was first done for live cells based on 7-AAD staining. Gating strategies were based on  
540 Fluorescence Minus One (FMO) controls. FlowJo v10 software was used for analyzing  
541 the flow cytometry data.

542

543 **CFU-F culture and mesenchymal sphere assay.**

544 For CFU-F cultures, sorted cells were seeded in 6-well plate ( $4-5 \times 10^3$  cells/well)  
545 containing culture medium ( $\alpha$ -MEM supplemented with 10% FBS, 1%  
546 Penicillin/Streptomycin solution and 1 ng/mL bFGF) and incubated at 37 °C with 5%  
547 CO<sub>2</sub>. Half of the medium was changed every 3-4 days. At day 10, cells were fixed and  
548 stained with crystal violet staining solution. Adherent colonies with more than 50 cells  
549 were quantified. Serial CFU-F colony formation was performed by seeding sorted cells  
550 in culture medium at clonal density, and serially passaged to generate the secondary

551 and tertiary colonies. For mesenchymal sphere assay,  $4\text{-}5 \times 10^3$  sorted cells were  
552 plated in a 6-well ultra-low adherent dish with culture medium and left undisturbed for  
553 a week<sup>98</sup>. Half of the medium was changed every week, and the spheres were  
554 quantified at day 10.

555

#### 556 **Adipogenic, osteogenic and chondrogenic differentiation assays.**

557 For nonclonal adipogenic and osteogenic differentiation, sorted cells were cultured for  
558 10 days and replated at a density of  $2.0 \times 10^4/\text{cm}^2$ . Adipogenic differentiation was  
559 performed in DMEM (Gibco) supplemented with 10% FBS, 1% Penicillin/Streptomycin,  
560  $0.5 \mu\text{M}$  isobutylmethylxanthine (Sigma),  $60 \mu\text{M}$  indomethacin (Sigma, 17378),  $5 \mu\text{g}/\text{ml}$   
561 insulin (Sigma) and  $1 \mu\text{M}$  dexamethasone (Sigma, D2915) for 1 week (medium was  
562 changed every 3 days), and quantified by oil red O staining (Sigma) and qPCR.  
563 Osteogenic differentiation was performed in osteogenic medium (Cyagen, GUXMX-  
564 90021) for 3 weeks (medium was changed every 3 days) and quantified by alizarin red  
565 staining (Sigma) and qPCR. The osteogenic differentiation medium contained  $\alpha$ -MEM  
566 supplemented with 10% fetal bovine serum, 1% Penicillin/Streptomycin, 1% glutamine,  
567  $50 \mu\text{g}/\text{ml}$  L-ascorbate acid,  $10 \text{ mM}$   $\beta$ -glycerophosphate and  $100 \text{ nM}$  dexamethasone.  
568 For nonclonal chondrogenic differentiation,  $2.5 \times 10^5$  cultured cells were centrifugated  
569 at  $1,100 \text{ rpm}$  in  $15 \text{ ml}$  polypropylene conical tubes to form pellets and cultured in  
570 chondrogenic medium for 3-4 weeks (medium was changed every 3 days). The  
571 chondrogenic medium contained high glucose DMEM (Corning) supplemented with  $10$   
572  $\text{ng}/\text{ml}$  TGF $\beta$ 3 (Peprotech),  $100 \text{ nM}$  dexamethasone (Sigma),  $50 \mu\text{g}/\text{ml}$  ascorbic acid-

573 2-phosphate (Sigma), 1 mM sodium pyruvate (Gibco), 40 µg/ml proline (Sigma) and  
574 1X ITS cell culture supplement (Cyagen) containing 6.25 µg/ml bovine insulin, 6.25  
575 µg/ml transferrin, 6.25 µg/ml selenous acid, 5.33 µg/ml linoleic acid and 1.25 mg/ml  
576 BSA. Chondrogenic differentiation was quantified by cryosection of the cell pellets  
577 followed by toluidine blue staining and qPCR. For clonal trilineage differentiation, single  
578 cells were flow cytometrically sorted into 96-well plates to form single CFU-F colonies.  
579 Clonally expanded cells were split into three parts and allowed to differentiate in  
580 osteogenic, adipogenic and chondrogenic mediums as described above. Clonal  
581 chondrogenic differentiation was also validated by alcian blue and safranin O staining.

582

#### 583 **RNA extraction and quantitative real-time PCR (qPCR).**

584 Total RNA was extracted from cells using Trizol reagent (Invitrogen) according to the  
585 manufacturer's instructions. cDNA was prepared using Transgene reverse  
586 transcription kit (Transgene). qPCR reactions were prepared using SYBR Green  
587 Master Mix (Applied Biosystem) and run on a 7500 Real-Time PCR Systems (Applied  
588 Biosystems). A list of the primers used was provided in Supplementary information,  
589 Table S5. Human *GADPH* was used as loading control and the relative mRNA  
590 abundance was calculated using a comparative CT method.

591

#### 592 **Renal subcapsular transplantation.**

593 The eSSCs were sorted by flow cytometry and cultured for 7-10 days as previously  
594 described<sup>99</sup>. Briefly,  $5 \times 10^5$  cells were resuspended in 5 µl of Matrigel (BD) on ice and

595 then aspirated into a micropipette (Drummond Scientific, 5-000-2010). A small incision  
596 was made near the kidney pole to separate the capsule from the renal parenchyma.  
597 Matrigel with cells were injected into the kidney pocket. Eight weeks after  
598 transplantation, grafts were dissected and fixed in 4% paraformaldehyde at 4 °C for 12  
599 h, decalcified in 10% EDTA at room temperature for 3 days and then dehydrated in 30%  
600 sucrose at 4 °C overnight. Grafts were then cryosectioned at 10 µm and stained by  
601 Movat Pentachrome Staining Kit (ScyTek, MPS-1) to demonstrate bone and cartilage  
602 differentiation. Immunostaining of collagen I and II were also performed on adjacent  
603 sections (see below).

604

#### 605 **Immunofluorescent staining.**

606 Slides containing renal subcapsular graft cryosections were blocked (10% horse  
607 serum and 0.1% Triton-X100 in PBS) at room temperature for 1h and stained with anti-  
608 collagen I (Abcam, ab34710, 1:500) and anti-collagen II (Abcam, ab185430, 1:500)  
609 antibodies at 4 °C overnight. After washing in PBS (3 x 10 minutes), anti-Rabbit Alexa  
610 Fluor 555 (Invitrogen, A31572, 1:500) and anti-Mouse Alexa Fluor 647 (Invitrogen,  
611 A31571, 1:500) secondary antibodies were incubated for 1h at room temperature. After  
612 washing in PBS (3 x 10 minutes), slides were mounted with ProLong™ Gold Antifade  
613 Mountant with DAPI (Invitrogen, P36931). For long bone cryosection staining, the  
614 following antibodies were used: anti-PDPN (eBioscience, 17-9381-41, 1:50), anti-  
615 CADM1 (abcam, ab3910, 1:100), anti-Rabbit Alexa Fluor 555 (Invitrogen,  
616 A31572, 1:500) and anti-Rat Alexa Fluor 647 (Invitrogen, A21472, 1:500). Images were

617 acquired with Olympus fluorescence inverted microscope (IX73) and analyzed by  
618 ImageJ software.

619

### 620 **Single-cell RNA-sequencing.**

621 Samples from different stages were harvested and live cells were sorted based on 7-  
622 AAD staining (90-95% viability after sorting). Cells were resuspended at  $1 \times 10^3$  cells/ml  
623 and loaded on Chromium Controller to obtain single cells (10X Genomics). For scRNA-  
624 seq libraries construction, Chromium Single cell 3' Library and Gel Bead Kit V2 (10X  
625 Genomics, PN120237) was used to generate single cell gel beads in emulsion (GEM).  
626 The captured cells were lysed, and the released RNA were reverse-transcribed with  
627 primers containing poly-T, barcode, unique molecular Identifiers (UMIs) and read 1  
628 primer sequence in GEMs. Barcoded cDNA was purified and amplified by PCR. The  
629 adaptor ligation reaction was performed to add sample index and read 2 primer  
630 sequence. After quality control, the libraries were sequenced on Illumina Hiseq X Ten  
631 platform in 150 bp pair-ended manner (Berry Genomics Corporation, Beijing, China).

632

### 633 **Processing of scRNA-seq data.**

634 Sequencing data from 10X Genomics were processed with *CellRanger* (version 3.0.1)  
635 for demultiplexing, barcode processing and single-cell 3' gene counting. Human  
636 genome reference (GRCh38) was used for sequence alignment. Only confidently  
637 mapped, non-PCR duplicates with valid barcodes and UMIs were used to generate the  
638 gene-barcode matrix. For quality control, only cells with more than 1, 000 genes and

639 less than 10% of mitochondrial gene were retained for downstream analysis. Cell  
640 doublets were removed using *Scrublet* software implemented in python<sup>100</sup>  
641 (<https://github.com/AllonKleinLab/scrublet>). Briefly, we computed doublet score for  
642 each cell by applying *Scrublet* function to each 10X dataset. Then we estimated the  
643 number of expected doublets ( $N$ ) with multiplet rates (based on the number of cells  
644 recovered) provided by 10X Genomics guideline. Top  $N$  of cells ranked by doublet  
645 scores were determined as doublets (Supplementary information, Fig. S1a and S6a).  
646 To correct batch effects among different samples, we applied canonical correlation  
647 analysis (CCA) method implemented in Seurat for dataset integration<sup>45</sup>. The union of  
648 the top 2,000 genes with the highest dispersion for each dataset was taken to identify  
649 anchors using the *FindIntegrationAnchors* function and calculate 30 dimensionalities.  
650 We then applied *IntegrateData* function to generate integrated expression matrix,  
651 which was used for dimensionality reduction and clustering subsequently. To exclude  
652 karyotype abnormalities in human embryos, we applied CNV estimation for single cells  
653 in 10X datasets from a previous study<sup>44</sup>. Briefly, we downloaded the expression matrix  
654 of non-malignant cells (T cells) and malignant cells as reference cells for the estimation  
655 of CNVs. We sampled 100 cells for each 10X dataset and combined them with  
656 reference cells to calculate initial CNVs and final CNVs. The CNV correlation score of  
657 each single-cell was computed and visualized by heatmap (Supplementary information,  
658 Fig. S1b).

659

660 **Dimensionality reduction and clustering.**

661 To reduce the variation in cell proliferation status that might interfere with single cell  
662 analysis, we used the previously reported G1/S and G2/M phase-specific genes to  
663 compute scores of S phase and G2M phase, as well as estimate cell-cycle status<sup>101</sup>.  
664 We scaled the integrated data with regressing the *S.Score* and *G2M.Score*, and  
665 calculated the top 30 principal components (PCs). For dimensionality reduction, we  
666 performed Uniform Manifold Approximation and Projection (UMAP) on whole datasets,  
667 and used Diffusion map and PCA to visualize the subset of datasets (Supplementary  
668 information, Table S3). t-Distributed Stochastic Neighbor Embedding (t-SNE) was  
669 applied to visualize the relationships between cell clusters at pseudo-bulk level. For  
670 clustering, improved graph-based clustering of the integrated dataset was performed  
671 using louvain algorithm after constructing the Shared Nearest Neighbor (SNN) graph.  
672 The resolution parameters were set to 0.2 (Supplementary information, Table S3). To  
673 ensure the robustness of clustering, we randomly subsampled 1,000 cells from each  
674 dataset, and re-processed as previous steps and parameters. The newly identified  
675 clusters showed an average assignment of 80% to clusters identified in the whole  
676 dataset.

677

### 678 **Species comparative analysis.**

679 For comparative analysis between human and mouse datasets, the expression data  
680 matrix of mouse E11.5 and E15.5 from GSE142425 were collected<sup>68</sup>. To ensure the  
681 comparability, the stage correspondences were identified<sup>102</sup> and the mouse datasets  
682 were processed by the same steps as human datasets, including dimension reduction

683 and clustering. *SciBet* R package (version 1.0)<sup>69</sup> was used to compare cell subsets  
684 identified in limb buds and long bones. We used the expression matrix of human cells  
685 as reference dataset and calculated the mean expression values of marker genes  
686 across cells with identical cell types. Multinomial models were then built and the query  
687 mouse dataset were re-annotated. Sankey plot with *ggalluvial* R package was applied  
688 to visualize the matching degree of predicted mouse cell type to the human reference.

689

#### 690 **Differential expression analysis.**

691 Non-parametric Wilcoxon rank sum test was performed to find DEGs among individual  
692 clusters. DEGs were filtered by fold change of more than 2 and cell fraction of more  
693 than 20%. DEGs with *P* value adjusted by *benjamini-hochberg* less than 0.01 were  
694 considered to be significant (Supplementary information, Table S1).

695

#### 696 **Single-cell regulatory network analysis.**

697 The analysis of single-cell gene regulatory network was performed using the *SCENIC*  
698 package<sup>64</sup>. A standard pipeline implemented in R can be found in  
699 <https://github.com/aertslab/SCENIC>. The expression matrix was loaded onto *GENIE3*  
700 for building the initial co-expression gene regulatory networks (*GRN*). The regulon data  
701 was then analyzed using the *RcisTarget* package to create TF motifs using hg19-tss-  
702 centered-10kb (for human) and mm9-tss-centered-10kb (for mouse) database. The  
703 regulon activity scores were calculated with Area Under the Curve (AUC) by the *AUCell*  
704 package. Significant regulons enriched in different clusters were calculated by two-



705 sided unpaired t test implemented in Limma R package (version 3.38.3)  
706 (Supplementary information, Table S2). The mean regulon activity scores for each  
707 cluster were calculated and visualized by heatmap. Predicted target genes of regulon  
708 were ranked by *Genie3Weight* value and filtered by normalized enrichment score (NES)  
709 of binding motifs (greater than 3). The transcriptional network of TF and predicted  
710 target genes was visualized by *Cytoscape* (version 3.6). Edges indicated the  
711 *Genie3Weights* and Node size indicated the number of motifs.

712

### 713 **Reconstructing single cell trajectory.**

714 Single cell trajectory was analyzed by R package *Slingshot* (version 1.0.0), which infers  
715 trajectory by fitting principal curves based on given cell embeddings<sup>81</sup>. After specifying  
716 the start or end cluster of the trajectory, cells were projected onto the curve to assign  
717 their developmental pseudotime. Specifically, we computed the diffusion map  
718 embeddings of OCPs, eSSCs, osteoprogenitors and two subsets of chondrocytes to  
719 infer osteo-chondrogenic trajectory. The diffusion components 1 and 3 were used as  
720 the input to *Slingshot* (Fig. 3d), and OCP was set as start cluster. For calvarial  
721 osteogenesis trajectory, we re-computed the UMAP embedding of NCs, mig\_NC, NCDCs,  
722 NCDCs, osteoprogenitors and two subsets of PMSCs, and used UMAP component 1  
723 and 2 as the input to *Slingshot*. The osteoprogenitor subset was set as end cluster (Fig.  
724 6e). To investigate temporally expressed genes changing in a continuous manner over  
725 pseudotime, *GAM* function implemented in gam R package was used to find pattern  
726 genes along the trajectories. For identification of major patterns, top 200 genes with

727 the most significant time-dependent model fit were retained, and expressions of these  
728 genes were smoothed over 20 adjacent cells. To quantify the connectivity of clusters  
729 within single-cell graph, the partition-based graph abstraction (*PAGA*) method  
730 implemented in Scanpy (version 1.4.3)<sup>103</sup> was used to generate the abstracted graph.

731

### 732 **RNA velocity.**

733 *RNA velocity*<sup>58</sup> was used for pseudo-time analysis in the integrated dataset of limb  
734 buds and long bones (Fig. 1f), as well as OCLC subsets (Fig. 3c). The spliced and un-  
735 spliced reads were quantified by the *velocity* (version 0.17.11) python package with  
736 human genome reference. The output loom file was analyzed for velocities of each  
737 gene following the pipeline of *scvelo* python package (version 0.1.25)<sup>104</sup>. Count matrix  
738 were filtered by top 2,000 highly variable genes and first- and second-order moments  
739 were computed for each cell with nearest neighbor set to 30.

740

### 741 **Transcript-averaged cell scoring (TACS).**

742 We adopted TACS as previously described to evaluate cell distribution along selected  
743 query genes<sup>73</sup>. For each cell, average expression of the top 100 correlated genes was  
744 set as the expression score of the query gene. *Stat\_density2d* function implemented  
745 in *ggplot2* package was used for visualization. Threshold for partitioning was set to  
746 zero.

747

### 748 **Gene functional annotation analysis.**

749 Gene ontology (GO) enrichment analysis was performed for DEGs using  
750 *clusterProfiler* package<sup>105</sup>. The significant DEGs were used as input to *compareCluster*  
751 function and ontology was set to the BP (biological process). The *P* values of enriched  
752 GO terms were adjusted by *Benjamini-Hochberg* method and terms were filtered by  
753 setting *pvalueCutoff* to 0.05. *Simplify* function was performed to remove redundancy  
754 of the enriched GO terms.

755

#### 756 **Gene set analysis.**

757 GSVA was performed using the GSVA R package (version 1.30.0)<sup>106</sup>. We selected  
758 gene sets of curated signaling pathways from the MSigDB Database (v7.0,  
759 <https://www.gsea-msigdb.org>) to identify pathways enriched in different limb  
760 mesenchymal subsets. The gene-by-cell matrix was converted to gene-set-by-cell  
761 matrix and GSVA scores were computed for gene sets with a minimum of 5 detected  
762 genes. Significant pathways enriched in different clusters were calculated by two-sided  
763 unpaired *t* test implemented in *Limma* R package (version 3.38.3).

764

#### 765 **Surface markers and TFs.**

766 Surface marker and transcription factor lists were downloaded from the *in silico* human  
767 surfaceome (<http://wlab.ethz.ch/surfaceome/>)<sup>107</sup> and HumanTFDB3.0  
768 (<http://bioinfo.life.hust.edu.cn/HumanTFDB/>) database websites (Supplementary  
769 information, Table S4).

770

771 **Statistics and reproducibility.**

772 Values in dot plots were presented as mean  $\pm$  SEM. Statistical analyses were  
773 performed using R and SPSS. The statistical significance of differences was  
774 determined using one-way ANOVA with for multiple comparisons. Wilcoxon signed  
775 rank test was used to determine the statistical significance of differences for gene  
776 expression ( $2^{-\Delta\Delta Ct}$ ) analyses (Fig. 4e, 5c and Supplementary information, Fig. S4d,  
777 S5d). For single-cell RNA sequencing, three biological replicates for limb bud at 5 WPC  
778 and long bone at 8 WPC, and two biological replicates for calvaria at 8 WPC. Clustering  
779 for single-cell data were confirmed using subsampling and re-clustering and similar  
780 results were obtained as described above. FACS assays were performed at three  
781 independent samples for sorting strategies (Fig. 4c). H&E staining and immunostaining  
782 were performed at two independent samples (Fig. 1a, 4b and Supplementary  
783 information, Fig. S6d). Clonal and Nonclonal differentiation experiments, qPCR assays,  
784 renal subcapsular transplantation were performed at three independent samples (Fig.  
785 5a,b,c,d and Supplementary information, Fig. S5b-d).

786

787 **Data availability**

788 The accession number for the human scRNA-seq data reported in this paper is GEO:  
789 GSE143753. All other relevant data are available from the corresponding authors upon  
790 request. The accession number for the count matrices of mouse datasets used in this  
791 paper is GSE142425<sup>68</sup>.

792

## 793 **References**

- 794 1 Chan CK, Seo EY, Chen JY *et al.* Identification and specification of the mouse skeletal stem cell.  
795 *Cell* 2015; **160**:285-298.
- 796 2 Worthley DL, Churchill M, Compton JT *et al.* Gremlin 1 identifies a skeletal stem cell with bone,  
797 cartilage, and reticular stromal potential. *Cell* 2015; **160**:269-284.
- 798 3 Mizuhashi K, Ono W, Matsushita Y *et al.* Resting zone of the growth plate houses a unique  
799 class of skeletal stem cells. *Nature* 2018; **563**:254-258.
- 800 4 Debnath S, Yallowitz AR, McCormick J *et al.* Discovery of a periosteal stem cell mediating  
801 intramembranous bone formation. *Nature* 2018; **562**:133-139.
- 802 5 Chan CKF, Gulati GS, Sinha R *et al.* Identification of the Human Skeletal Stem Cell. *Cell* 2018;  
803 **175**:43-56 e21.
- 804 6 Zhou BO, Yue R, Murphy MM, Peyer JG, Morrison SJ. Leptin-receptor-expressing  
805 mesenchymal stromal cells represent the main source of bone formed by adult bone marrow.  
806 *Cell stem cell* 2014; **15**:154-168.
- 807 7 Yue R, Zhou BO, Shimada IS, Zhao Z, Morrison SJ. Leptin Receptor Promotes Adipogenesis and  
808 Reduces Osteogenesis by Regulating Mesenchymal Stromal Cells in Adult Bone Marrow. *Cell*  
809 *stem cell* 2016; **18**:782-796.
- 810 8 Bianco P, Robey PG. Skeletal stem cells. *Development* 2015; **142**:1023-1027.
- 811 9 Robey PG, Kuznetsov SA, Riminucci M, Bianco P. Skeletal ("mesenchymal") stem cells for tissue  
812 engineering. *Methods in molecular medicine* 2007; **140**:83-99.
- 813 10 Matsushita Y, Ono W, Ono N. Skeletal Stem Cells for Bone Development and Repair: Diversity  
814 Matters. *Current osteoporosis reports* 2020; **18**:189-198.
- 815 11 Ambrosi TH, Longaker MT, Chan CKF. A Revised Perspective of Skeletal Stem Cell Biology.  
816 *Frontiers in cell and developmental biology* 2019; **7**:189.
- 817 12 Maes C, Kobayashi T, Selig MK *et al.* Osteoblast precursors, but not mature osteoblasts, move  
818 into developing and fractured bones along with invading blood vessels. *Dev Cell* 2010; **19**:329-  
819 344.
- 820 13 Ono N, Ono W, Nagasawa T, Kronenberg HM. A subset of chondrogenic cells provides early  
821 mesenchymal progenitors in growing bones. *Nature cell biology* 2014; **16**:1157-1167.
- 822 14 Ono N, Ono W, Mizoguchi T, Nagasawa T, Frenette PS, Kronenberg HM. Vasculature-  
823 associated cells expressing nestin in developing bones encompass early cells in the osteoblast  
824 and endothelial lineage. *Dev Cell* 2014; **29**:330-339.
- 825 15 Lefebvre V, Bhattaram P. Vertebrate skeletogenesis. *Current topics in developmental biology*  
826 2010; **90**:291-317.
- 827 16 Zeller R, Lopez-Rios J, Zuniga A. Vertebrate limb bud development: moving towards  
828 integrative analysis of organogenesis. *Nature reviews Genetics* 2009; **10**:845-858.
- 829 17 Tarchini B, Duboule D, Kmita M. Regulatory constraints in the evolution of the tetrapod limb  
830 anterior-posterior polarity. *Nature* 2006; **443**:985-988.
- 831 18 Mariani FV, Ahn CP, Martin GR. Genetic evidence that FGFs have an instructive role in limb  
832 proximal-distal patterning. *Nature* 2008; **453**:401-405.
- 833 19 Dudley AT, Ros MA, Tabin CJ. A re-examination of proximodistal patterning during vertebrate  
834 limb development. *Nature* 2002; **418**:539-544.
- 835 20 Niswander L, Tickle C, Vogel A, Booth I, Martin GR. FGF-4 replaces the apical ectodermal

- 836 ridge and directs outgrowth and patterning of the limb. *Cell* 1993; **75**:579-587.
- 837 21 Kawakami Y, Capdevila J, Buscher D, Itoh T, Rodriguez Esteban C, Izpisua Belmonte JC. WNT  
838 signals control FGF-dependent limb initiation and AER induction in the chick embryo. *Cell* 2001;  
839 **104**:891-900.
- 840 22 Reinhardt R, Gullotta F, Nusspaumer G *et al.* Molecular signatures identify immature  
841 mesenchymal progenitors in early mouse limb buds that respond differentially to morphogen  
842 signaling. *Development* 2019; **146**:<https://doi.org/10.1242/dev.173328>.
- 843 23 Pearse RV, 2nd, Scherz PJ, Campbell JK, Tabin CJ. A cellular lineage analysis of the chick limb  
844 bud. *Developmental biology* 2007; **310**:388-400.
- 845 24 Kronenberg HM. Developmental regulation of the growth plate. *Nature* 2003; **423**:332-336.
- 846 25 Calvi LM, Adams GB, Weibrecht KW *et al.* Osteoblastic cells regulate the haematopoietic stem  
847 cell niche. *Nature* 2003; **425**:841-846.
- 848 26 Sacchetti B, Funari A, Michienzi S *et al.* Self-renewing osteoprogenitors in bone marrow  
849 sinusoids can organize a hematopoietic microenvironment. *Cell* 2007; **131**:324-336.
- 850 27 Ding L, Saunders TL, Enikolopov G, Morrison SJ. Endothelial and perivascular cells maintain  
851 haematopoietic stem cells. *Nature* 2012; **481**:457-462.
- 852 28 Sugiyama T, Kohara H, Noda M, Nagasawa T. Maintenance of the hematopoietic stem cell  
853 pool by CXCL12-CXCR4 chemokine signaling in bone marrow stromal cell niches. *Immunity*  
854 2006; **25**:977-988.
- 855 29 Chan CK, Chen CC, Luppen CA *et al.* Endochondral ossification is required for haematopoietic  
856 stem-cell niche formation. *Nature* 2009; **457**:490-494.
- 857 30 Opperman LA. Cranial sutures as intramembranous bone growth sites. *Developmental*  
858 *dynamics : an official publication of the American Association of Anatomists* 2000; **219**:472-485.
- 859 31 Hall BK, Miyake T. The membranous skeleton: the role of cell condensations in vertebrate  
860 skeletogenesis. *Anatomy and embryology* 1992; **186**:107-124.
- 861 32 Holmbeck K, Bianco P, Caterina J *et al.* MT1-MMP-deficient mice develop dwarfism,  
862 osteopenia, arthritis, and connective tissue disease due to inadequate collagen turnover. *Cell*  
863 1999; **99**:81-92.
- 864 33 Holmbeck K, Bianco P, Chrysovergis K, Yamada S, Birkedal-Hansen H. MT1-MMP-dependent,  
865 apoptotic remodeling of unmineralized cartilage: a critical process in skeletal growth. *The Journal*  
866 *of cell biology* 2003; **163**:661-671.
- 867 34 Chai Y, Jiang X, Ito Y *et al.* Fate of the mammalian cranial neural crest during tooth and  
868 mandibular morphogenesis. *Development* 2000; **127**:1671-1679.
- 869 35 Quarto N, Wan DC, Kwan MD, Panetta NJ, Li S, Longaker MT. Origin matters: differences in  
870 embryonic tissue origin and Wnt signaling determine the osteogenic potential and healing  
871 capacity of frontal and parietal calvarial bones. *Journal of bone and mineral research : the official*  
872 *journal of the American Society for Bone and Mineral Research* 2010; **25**:1680-1694.
- 873 36 Zeng Y, He J, Bai Z *et al.* Tracing the first hematopoietic stem cell generation in human  
874 embryo by single-cell RNA sequencing. *Cell research* 2019; **29**:881-894.
- 875 37 Kolodziejczyk AA, Kim JK, Svensson V, Marioni JC, Teichmann SA. The technology and biology  
876 of single-cell RNA sequencing. *Molecular cell* 2015; **58**:610-620.
- 877 38 Bian Z, Gong Y, Huang T *et al.* Deciphering human macrophage development at single-cell  
878 resolution. *Nature* 2020:<https://doi.org/10.1038/s41586-41020-42316-41587>.
- 879 39 Cao J, Spielmann M, Qiu X *et al.* The single-cell transcriptional landscape of mammalian

- 880 organogenesis. *Nature* 2019; **566**:496-502.
- 881 40 Tikhonova AN, Dolgalev I, Hu H *et al.* The bone marrow microenvironment at single-cell  
882 resolution. *Nature* 2019; **569**:222-228.
- 883 41 Baryawno N, Przybylski D, Kowalczyk MS *et al.* A Cellular Taxonomy of the Bone Marrow  
884 Stroma in Homeostasis and Leukemia. *Cell* 2019; **177**:1915-1932 e1916.
- 885 42 Wolock SL, Krishnan I, Tenen DE *et al.* Mapping Distinct Bone Marrow Niche Populations and  
886 Their Differentiation Paths. *Cell Rep* 2019; **28**:302-311 e305.
- 887 43 Gerber T, Murawala P, Knapp D *et al.* Single-cell analysis uncovers convergence of cell  
888 identities during axolotl limb regeneration. *Science* 2018; **362**:eaaq0681.  
889 <http://doi.org/0610.1126/science.aaq0681>.
- 890 44 Ma L, Hernandez MO, Zhao Y *et al.* Tumor Cell Biodiversity Drives Microenvironmental  
891 Reprogramming in Liver Cancer. *Cancer cell* 2019; **36**:418-430 e416.
- 892 45 Butler A, Hoffman P, Smibert P, Papalexi E, Satija R. Integrating single-cell transcriptomic data  
893 across different conditions, technologies, and species. *Nature biotechnology* 2018; **36**:411-420.
- 894 46 Rousseeuw P. Silhouettes: A Graphical Aid to the Interpretation and Validation of Cluster  
895 Analysis. *Journal of Computational and Applied Mathematics* 1987; **20**:53-65.
- 896 47 Litvinov SV, Velders MP, Bakker HA, Fleuren GJ, Warnaar SO. Ep-CAM: a human epithelial  
897 antigen is a homophilic cell-cell adhesion molecule. *The Journal of cell biology* 1994; **125**:437-  
898 446.
- 899 48 Paul RW, Lee PW. Glycophorin is the reovirus receptor on human erythrocytes. *Virology* 1987;  
900 **159**:94-101.
- 901 49 Buckingham M, Rigby PW. Gene regulatory networks and transcriptional mechanisms that  
902 control myogenesis. *Dev Cell* 2014; **28**:225-238.
- 903 50 Breier G, Breviario F, Caveda L *et al.* Molecular cloning and expression of murine vascular  
904 endothelial-cadherin in early stage development of cardiovascular system. *Blood* 1996; **87**:630-  
905 641.
- 906 51 Holness CL, Simmons DL. Molecular cloning of CD68, a human macrophage marker related to  
907 lysosomal glycoproteins. *Blood* 1993; **81**:1607-1613.
- 908 52 Komori T, Yagi H, Nomura S *et al.* Targeted disruption of Cbfa1 results in a complete lack of  
909 bone formation owing to maturational arrest of osteoblasts. *Cell* 1997; **89**:755-764.
- 910 53 Kocialkowski S, Yeger H, Kingdom J, Perbal B, Schofield PN. Expression of the human NOV  
911 gene in first trimester fetal tissues. *Anatomy and embryology* 2001; **203**:417-427.
- 912 54 Kawai S, Michikami I, Kitagaki J, Hashino E, Amano A. Expression pattern of zinc-finger  
913 transcription factor Odd-skipped related 2 in murine development and neonatal stage. *Gene  
914 expression patterns : GEP* 2013; **13**:372-376.
- 915 55 Bi W, Deng JM, Zhang Z, Behringer RR, de Crombrughe B. Sox9 is required for cartilage  
916 formation. *Nature genetics* 1999; **22**:85-89.
- 917 56 Hasty P, Bradley A, Morris JH *et al.* Muscle deficiency and neonatal death in mice with a  
918 targeted mutation in the myogenin gene. *Nature* 1993; **364**:501-506.
- 919 57 Finzsch M, Schreiner S, Kichko T *et al.* Sox10 is required for Schwann cell identity and  
920 progression beyond the immature Schwann cell stage. *The Journal of cell biology* 2010;  
921 **189**:701-712.
- 922 58 La Manno G, Soldatov R, Zeisel A *et al.* RNA velocity of single cells. *Nature* 2018; **560**:494-  
923 498.

- 924 59 Wolf FA, Hamey FK, Plass M *et al*. PAGA: graph abstraction reconciles clustering with  
925 trajectory inference through a topology preserving map of single cells. *Genome biology* 2019;  
926 **20**:59.
- 927 60 Summerbell D, Lewis JH, Wolpert L. Positional information in chick limb morphogenesis.  
928 *Nature* 1973; **244**:492-496.
- 929 61 Mallo M. Reassessing the Role of Hox Genes during Vertebrate Development and Evolution.  
930 *Trends Genet* 2018; **34**:209-217.
- 931 62 Mercader N, Leonardo E, Piedra ME, Martinez AC, Ros MA, Torres M. Opposing RA and FGF  
932 signals control proximodistal vertebrate limb development through regulation of Meis genes.  
933 *Development* 2000; **127**:3961-3970.
- 934 63 Tickle C, Alberts B, Wolpert L, Lee J. Local application of retinoic acid to the limb bud mimics  
935 the action of the polarizing region. *Nature* 1982; **296**:564-566.
- 936 64 Aibar S, Gonzalez-Blas CB, Moerman T *et al*. SCENIC: single-cell regulatory network inference  
937 and clustering. *Nature methods* 2017; **14**:1083-1086.
- 938 65 Pizette S, Abate-Shen C, Niswander L. BMP controls proximodistal outgrowth, via induction of  
939 the apical ectodermal ridge, and dorsoventral patterning in the vertebrate limb. *Development*  
940 2001; **128**:4463-4474.
- 941 66 Marcil A, Dumontier E, Chamberland M, Camper SA, Drouin J. Pitx1 and Pitx2 are required for  
942 development of hindlimb buds. *Development* 2003; **130**:45-55.
- 943 67 Selleri L, Depew MJ, Jacobs Y *et al*. Requirement for Pbx1 in skeletal patterning and  
944 programming chondrocyte proliferation and differentiation. *Development* 2001; **128**:3543-3557.
- 945 68 Kelly NH, Huynh NPT, Guilak F. Single cell RNA-sequencing reveals cellular heterogeneity and  
946 trajectories of lineage specification during murine embryonic limb development. *Matrix biology :*  
947 *journal of the International Society for Matrix Biology*  
948 2019:<https://doi.org/10.1016/j.matbio.2019.1012.1004>.
- 949 69 Li C, Liu B, Kang B *et al*. SciBet as a portable and fast single cell type identifier. *Nature*  
950 *communications* 2020; **11**:1818.
- 951 70 Fernandez-Teran MA, Hinchliffe JR, Ros MA. Birth and death of cells in limb development: a  
952 mapping study. *Developmental dynamics : an official publication of the American Association of*  
953 *Anatomists* 2006; **235**:2521-2537.
- 954 71 Houlihan DD, Mabuchi Y, Morikawa S *et al*. Isolation of mouse mesenchymal stem cells on the  
955 basis of expression of Sca-1 and PDGFR-alpha. *Nature protocols* 2012; **7**:2103-2111.
- 956 72 Bialek P, Kern B, Yang X *et al*. A twist code determines the onset of osteoblast differentiation.  
957 *Dev Cell* 2004; **6**:423-435.
- 958 73 Kernfeld EM, Genga RMJ, Neherin K, Magaletta ME, Xu P, Maehr R. A Single-Cell  
959 Transcriptomic Atlas of Thymus Organogenesis Resolves Cell Types and Developmental  
960 Maturation. *Immunity* 2018; **48**:1258-1270 e1256.
- 961 74 Achilleos A, Trainor PA. Neural crest stem cells: discovery, properties and potential for  
962 therapy. *Cell research* 2012; **22**:288-304.
- 963 75 Zeisel A, Hochgerner H, Lonnerberg P *et al*. Molecular Architecture of the Mouse Nervous  
964 System. *Cell* 2018; **174**:999-1014 e1022.
- 965 76 Huang GY, Cooper ES, Waldo K, Kirby ML, Gilula NB, Lo CW. Gap junction-mediated cell-cell  
966 communication modulates mouse neural crest migration. *The Journal of cell biology* 1998;  
967 **143**:1725-1734.



- 968 77 Jourdeuil K, Taneyhill LA. The gap junction protein connexin 43 controls multiple aspects of  
969 cranial neural crest cell development. *Journal of cell science* 2020;  
970 **133**:<https://doi.org/10.1242/jcs.235440>.
- 971 78 Rice R, Rice DP, Olsen BR, Thesleff I. Progression of calvarial bone development requires  
972 Foxc1 regulation of Msx2 and Alx4. *Developmental biology* 2003; **262**:75-87.
- 973 79 Ryoo HM, Hoffmann HM, Beumer T *et al*. Stage-specific expression of Dlx-5 during  
974 osteoblast differentiation: involvement in regulation of osteocalcin gene expression. *Molecular*  
975 *endocrinology* 1997; **11**:1681-1694.
- 976 80 Yue R, Shen B, Morrison SJ. Clec11a/osteolectin is an osteogenic growth factor that promotes  
977 the maintenance of the adult skeleton. *Elife* 2016; **5**:<https://doi.org/10.7554/eLife.18782>.
- 978 81 Street K, Risso D, Fletcher RB *et al*. Slingshot: cell lineage and pseudotime inference for  
979 single-cell transcriptomics. *BMC genomics* 2018; **19**:477.
- 980 82 Cahoy JD, Emery B, Kaushal A *et al*. A transcriptome database for astrocytes, neurons, and  
981 oligodendrocytes: a new resource for understanding brain development and function. *The*  
982 *Journal of neuroscience : the official journal of the Society for Neuroscience* 2008; **28**:264-278.
- 983 83 Shen B, Vardy K, Hughes P *et al*. Integrin alpha11 is an Osteolectin receptor and is required  
984 for the maintenance of adult skeletal bone mass. *Elife* 2019; **8**.
- 985 84 Feregrino C, Sacher F, Parnas O, Tschopp P. A single-cell transcriptomic atlas of the  
986 developing chicken limb. *BMC genomics* 2019; **20**:401.
- 987 85 Ferguson GB, Van Handel B, Bay M *et al*. Mapping molecular landmarks of human skeletal  
988 ontogeny and pluripotent stem cell-derived articular chondrocytes. *Nature communications*  
989 2018; **9**:3634.
- 990 86 Xi H, Langerman J, Sabri S *et al*. A Human Skeletal Muscle Atlas Identifies the Trajectories of  
991 Stem and Progenitor Cells across Development and from Human Pluripotent Stem Cells. *Cell*  
992 *stem cell* 2020:<https://doi.org/10.1016/j.stem.2020.1004.1017>.
- 993 87 Soneson C, Srivastava A, Patro R, Stadler MB. Preprocessing choices affect RNA velocity  
994 results for droplet scRNA-seq data. *bioRxiv*  
995 2020:<https://doi.org/10.1101/2020.1103.1113.990069>.
- 996 88 Zhao H, Zhou W, Yao Z *et al*. Foxp1/2/4 regulate endochondral ossification as a suppresser  
997 complex. *Developmental biology* 2015; **398**:242-254.
- 998 89 Xu S, Liu P, Chen Y *et al*. Foxp2 regulates anatomical features that may be relevant for vocal  
999 behaviors and bipedal locomotion. *Proceedings of the National Academy of Sciences of the*  
1000 *United States of America* 2018; **115**:8799-8804.
- 1001 90 Inoue T, Hagiyaama M, Enoki E *et al*. Cell adhesion molecule 1 is a new osteoblastic cell  
1002 adhesion molecule and a diagnostic marker for osteosarcoma. *Life sciences* 2013; **92**:91-99.
- 1003 91 Ivanovs A, Rybtsov S, Ng ES, Stanley EG, Elefanty AG, Medvinsky A. Human haematopoietic  
1004 stem cell development: from the embryo to the dish. *Development* 2017; **144**:2323-2337.
- 1005 92 Nakahara F, Borger DK, Wei Q *et al*. Engineering a haematopoietic stem cell niche by  
1006 revitalizing mesenchymal stromal cells. *Nature cell biology* 2019; **21**:560-567.
- 1007 93 Abbuehl JP, Tatarova Z, Held W, Huelsken J. Long-Term Engraftment of Primary Bone  
1008 Marrow Stromal Cells Repairs Niche Damage and Improves Hematopoietic Stem Cell  
1009 Transplantation. *Cell stem cell* 2017; **21**:241-255 e246.
- 1010 94 Couly GF, Coltey PM, Le Douarin NM. The triple origin of skull in higher vertebrates: a study in  
1011 quail-chick chimeras. *Development* 1993; **117**:409-429.

1012 95 Cesario JM, Almaidhan AA, Jeong J. Expression of forkhead box transcription factor genes  
1013 Foxp1 and Foxp2 during jaw development. *Gene expression patterns : GEP* 2016; **20**:111-119.  
1014 96 Moore KL, Persaud TVN, Torchia MG. The Developing Human E-Book: Clinically Oriented  
1015 Embryology With STUDENT CONSULT Online Access: Elsevier Health Sciences 2011.  
1016 97 Staedtler F, Hartmann N, Letzkus M *et al.* Robust and tissue-independent gender-specific  
1017 transcript biomarkers. *Biomarkers : biochemical indicators of exposure, response, and*  
1018 *susceptibility to chemicals* 2013; **18**:436-445.  
1019 98 Pinho S, Lacombe J, Hanoun M *et al.* PDGFRalpha and CD51 mark human nestin+ sphere-  
1020 forming mesenchymal stem cells capable of hematopoietic progenitor cell expansion. *The*  
1021 *Journal of experimental medicine* 2013; **210**:1351-1367.  
1022 99 Gulati GS, Murphy MP, Marecic O *et al.* Isolation and functional assessment of mouse skeletal  
1023 stem cell lineage. *Nature protocols* 2018; **13**:1294-1309.  
1024 100 Wolock SL, Lopez R, Klein AM. Scrublet: Computational Identification of Cell Doublets in  
1025 Single-Cell Transcriptomic Data. *Cell systems* 2019; **8**:281-291 e289.  
1026 101 Tirosh I, Izar B, Prakadan SM *et al.* Dissecting the multicellular ecosystem of metastatic  
1027 melanoma by single-cell RNA-seq. *Science* 2016; **352**:189-196.  
1028 102 H B, B.H.J J. An atlas for staging mammalian and chick embryos. *Crc Press* 1987.  
1029 103 Wolf FA, Angerer P, Theis FJ. SCANPY: large-scale single-cell gene expression data analysis.  
1030 *Genome biology* 2018; **19**:15.  
1031 104 Bergen V, Lange M, Peidli S, Wolf FA, Theis FJ. Generalizing RNA velocity to transient cell  
1032 states through dynamical modeling. *bioRxiv* 2019:<https://doi.org/10.1101/820936>.  
1033 105 Yu G, Wang LG, Han Y, He QY. clusterProfiler: an R package for comparing biological themes  
1034 among gene clusters. *OmicS : a journal of integrative biology* 2012; **16**:284-287.  
1035 106 Hanzelmann S, Castelo R, Guinney J. GSVA: gene set variation analysis for microarray and  
1036 RNA-seq data. *BMC bioinformatics* 2013; **14**:7.  
1037 107 Bausch-Fluck D, Goldmann U, Muller S *et al.* The in silico human surfaceome. *Proceedings of*  
1038 *the National Academy of Sciences of the United States of America* 2018; **115**:E10988-E10997.

1039

1040

## 1041 **Figure legends**

1042 **Fig. 1. Integrated analysis of human limb buds and embryonic long bones.**

1043 **a**, Representative stereoscope images (left) and H&E images (right) of 5 WPC

1044 human limb bud and 8 WPC human long bone. Scale bars: 100  $\mu$ m.

1045 **b**, Sampling workflow and experimental scheme. Human embryonic cells from 5

1046 WPC limb buds and 8 WPC long bones were sorted and subjected to droplet-based

1047 scRNA-seq.

1048 **c**, Distribution of 35,570 cells from limb buds and long bones. 16 subsets were  
1049 visualized by uniform manifold approximation and projection (UMAP).

1050 **d**, Dot plots showing the expression of curated feature genes in 16 subsets. Dot size  
1051 represented the proportion of cells expressing specific gene in the indicated subset  
1052 and color bar represented the gene expression levels.

1053 **e**, Proportion of cells from 5 WPC limb buds and 8 WPC long bones in each subset.

1054 **f**, Developmental trajectory inferred by RNA velocity and visualized on the UMAP  
1055 projection.

1056 **g**, Partition-based graph abstraction (PAGA) showing the connectivity among subsets  
1057 in (f). The mean expression of representative genes (Mesenchymal: *PRRX1*;  
1058 Chondrogenic: *SOX9*; Osteogenic: *RUNX2*) in each subset was showed in  
1059 abstracted graph. Line thickness indicated the strength of connectivity. Color bar  
1060 represents the gene expression levels.

1061

1062 **Fig. 2. Characterization of human limb bud mesenchyme and epithelium**

1063 **a**, UAMP visualization of the 10 subsets in 5 WPC limb buds.

1064 **b**, Hierarchical clustering of the mesenchymal and epithelial subsets using top 50  
1065 principal components (PCs).

1066 **c**, The inferred relationships among the mesenchymal and epithelial subsets in PAGA  
1067 layout.

1068 **d**, Stacked bar charts showing the cell cycle distributions in the mesenchymal  
1069 subsets.

1070 **e**, Enriched GO terms of differentially expressed genes (DEGs) in the mesenchymal

1071 subsets.

1072 **f**, Heatmap showing expression of curated HOX genes scaled across the

1073 mesenchymal subsets. Hox genes were clustered into two branches based on

1074 hierarchical clustering of the rows, as indicated in green and purple.

1075 **g**, Visualization of the mesenchymal subsets (left) with UMAP plots showing the

1076 expression of curated PD and AP marker genes (right; Proximal: MEIS2; Distal:

1077 HOXD13; Anterior: IRX3; Posterior: SHH).

1078 **h**, GSVA analysis of pathway enrichment in the proximal and core mesenchyme

1079 (Mes3/OCP) and distal mesenchyme (Mes1/2). T values for each pathway were

1080 shown (two-sided unpaired limma-moderated t test).

1081 **i**, Heatmap showing the area under the curve (AUC) score of regulons enriched in

1082 the mesenchymal subsets. Z-score (row scaling) was computed. Hierarchical

1083 clustering on rows and columns indicated regulon patterns and correlation between

1084 cell subsets, respectively. AUC of representative regulons were shown by UMAP

1085 plots.

1086

1087 **Fig. 3. Characterization of the osteochondral lineage in human long bones**

1088 **identified embryonic SSCs**

1089 **a**, UMAP visualization of 7 OCLC subsets in 8 WPC human long bones.

1090 **b**, Enriched GO terms of differentially expressed genes (DEGs) among the 7 OCLC

1091 subsets.

1092 **c**, Developmental trajectory of 7 OCLC subsets inferred by RNA velocity and  
1093 visualized on the UMAP projection.

1094 **d**, UMAP visualization of the osteogenic and chondrogenic trajectories simulated by  
1095 Slingshot across OCP, eSSC, osteoprogenitor, chondroblast and chondrocyte  
1096 subsets. The corresponding diffusion pseudotime was indicated in the upper right  
1097 frame.

1098 **e**, Heatmap of gene expressions (smoothed over 20 adjacent cells) in OCP, eSSC,  
1099 osteoprogenitor, chondroblast and chondrocyte subsets ordered by pseudotime of  
1100 osteogenesis and chondrogenesis in (**d**). Top 200 genes were selected according to  
1101 the *P* values of GVM test and representative genes were shown. Shared genes in the  
1102 two trajectories were indicated in dashed box.

1103 **f**, Heatmap showing the AUC score of regulons enriched in human OCLC subsets. Z-  
1104 score (column scaling) was calculated. Representative regulons were shown on the  
1105 top. The number of predicted target genes for each regulon was shown in the  
1106 parenthesis.

1107 **g**, AUC of FOXP1 and FOXP2 regulons were shown by UMAP plots.

1108 **h**, The FOXP1 and FOXP2 regulon networks in OCLC subsets. Line thickness  
1109 indicated the level of GENIE3 weights. Dot size indicated the number of enriched TF  
1110 motifs.

1111

1112 **Fig. 4. Identification of CADM1 as a phenotypic marker of eSSCs**

1113 **a**, Dot plots showing the expression of differentially expressed cell surface genes

1114 (left) and candidate SSC markers (right) in 8 WPC human long bone subsets.

1115 Asterisks indicated positive markers that were used to enrich eSSCs.

1116 **b**, Immunofluorescent images of PDPN<sup>+</sup>CADM1<sup>+</sup> cells in 8 WPC human long bones.

1117 Overviews of PDPN<sup>+</sup>CADM1<sup>+</sup> cells (arrows) in the articular (upper left) and POC

1118 (bottom left) regions were shown on the left. PDPN<sup>+</sup>CADM1<sup>+</sup> cells were found in the

1119 inner layer of perichondrium in articular regions (i) and surrounding POC (ii). A few

1120 PDPN<sup>+</sup>CADM1<sup>+</sup> cells were also found inside POC (iii). Arrow heads indicated

1121 enlarged PDPN<sup>+</sup>CADM1<sup>+</sup> cells. Merged and single-channel images of DAPI (blue),

1122 CADM1 (red) and PDPN (green) were shown. Scale bars: 200  $\mu$ m.

1123 **c**, Flow cytometry gating strategies for sorting different populations in 8 WPC long

1124 bones.

1125 **d**, Representative crystal violet staining of CFU-F colonies generated by the sorted

1126 populations as indicated in (c). Magnified images of the boxed areas were shown on

1127 the right. Scale bars: 25  $\mu$ m.

1128 **e**, Quantifications of the number (top) and mean diameter (bottom) of the CFU-F

1129 colonies. The statistical significance of differences was determined using one-way

1130 ANOVA with multiple comparison tests (LSD). \*  $P < 0.05$ ; \*\*  $P < 0.01$ ; \*\*\*  $P < 0.001$ .

1131 Error bars indicated SEM.

1132

1133 **Fig. 5. Functional characterizations of eSSCs *in vitro* and *in vivo***

1134 **a**, Flow cytometry plots showing the maintenance of phenotypic eSSCs after serially

1135 passaging clonally expanded PDGFRA<sup>low</sup>-PDPN<sup>+</sup>CADM1<sup>+</sup> cells.

1136 **b**, Representative oil red O (top), alizarin red (middle) and toluidine blue (bottom)  
1137 staining after adipogenic, osteogenic and chondrogenic differentiation of clonally  
1138 expanded eSSCs (PDGFRA<sup>low</sup>/PDPN<sup>+</sup>CADM1<sup>+</sup>). Magnified images of the boxed  
1139 areas were shown on the right. Scale bars: 200  $\mu$ m.  
1140 **c**, qPCR analyses of adipogenic, osteogenic and chondrogenic marker genes in  
1141 clonally expanded eSSCs before and after trilineage differentiation *in vitro*. The  
1142 statistical significance of differences was determined using Wilcoxon signed rank  
1143 test. \*  $P < 0.05$ ; \*\*  $P < 0.01$ . Error bars indicated SEM.  
1144 **d**, Renal subcapsular transplantation. The work flow for functional characterization of  
1145 eSSC *in vivo* (top). Subcapsular xenografts were dissected and sectioned 8 weeks  
1146 after transplantation of culture expanded eSSCs into immunodeficient mice. Bright  
1147 field (middle), Movat pentachrome staining (bottom left, cartilage: blue, bone and  
1148 fibrous tissue: yellow) and immunofluorescent staining images (bottom right, DAPI:  
1149 blue, collagen I: red, collagen II: green) were shown. Scale bars: 50  $\mu$ m.

1150

1151 **Fig. 6. Characterization of the osteogenic lineages in human embryonic**

1152 **calvaria identified neural crest-derived skeletal progenitors**

1153 **a**, UMAP visualization of 12 subsets in 8 WPC calvarial bones. Inset illustrated the  
1154 position of calvarial bone.

1155 **b**, Violin plots showing the expression of feature genes for each subset.

1156 **c**, Heatmap showing the transcriptome correlation between osteogenic subsets in  
1157 calvarial and OCLC subsets in long bone. Asterisks indicated subsets with correlation

1158 coefficients > 0.8.

1159 **d**, Dot plots (left) and UMAP plots (right) showing the expression of eSSC marker  
1160 genes subsets of 8 WPC calvarial.

1161 **e**, UMAP visualization of the two osteogenic trajectories simulated by Slingshot  
1162 across NC, mig\_NC, NCDC, osteoprogenitor, PMSC1 and PMSC2 subsets (Upper  
1163 left). Expression UMAP plots of marker genes (NC: *FOXC1*; Mesoderm: *TWIST2*;  
1164 Osteoprogenitor: *DLX5*).

1165 **f**, Heatmap of the gene expressions (smoothed over 20 adjacent cells) in subsets  
1166 ordered by pseudotime of osteogenesis as in (**e**). Top 200 genes were selected  
1167 according to the *P* values of GVM test and representative genes were shown. Shared  
1168 genes in two trajectories were indicated in dashed box.

1169 **g**, Heatmap showing the AUC scores of regulons enriched in the osteogenic subsets.  
1170 Z-score (row scaling) was computed. Representative regulons were shown on the  
1171 right.

1172 **h**, AUC of FOXP1/2/4 regulons were shown by UMAP plots.



**Figure 1**

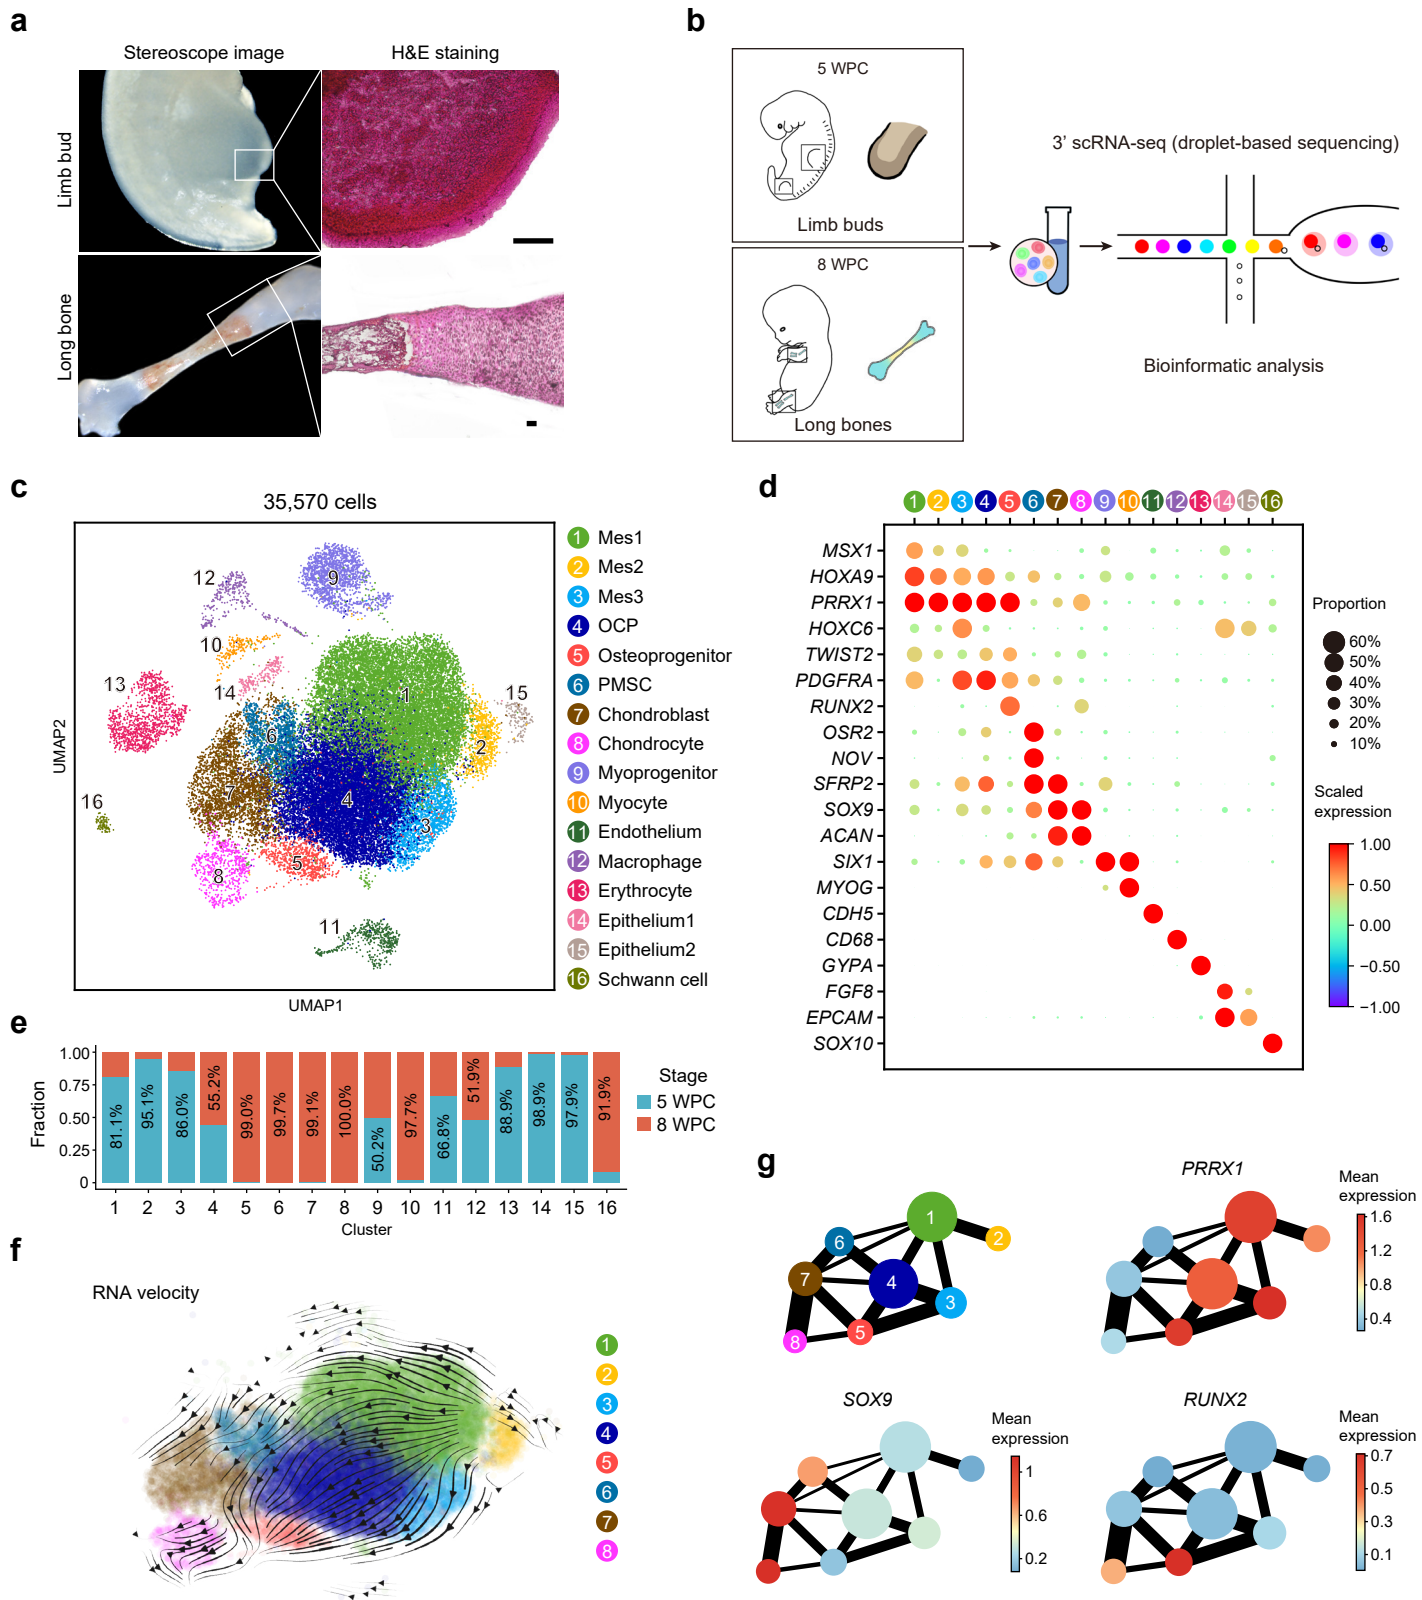

**Figure 2**

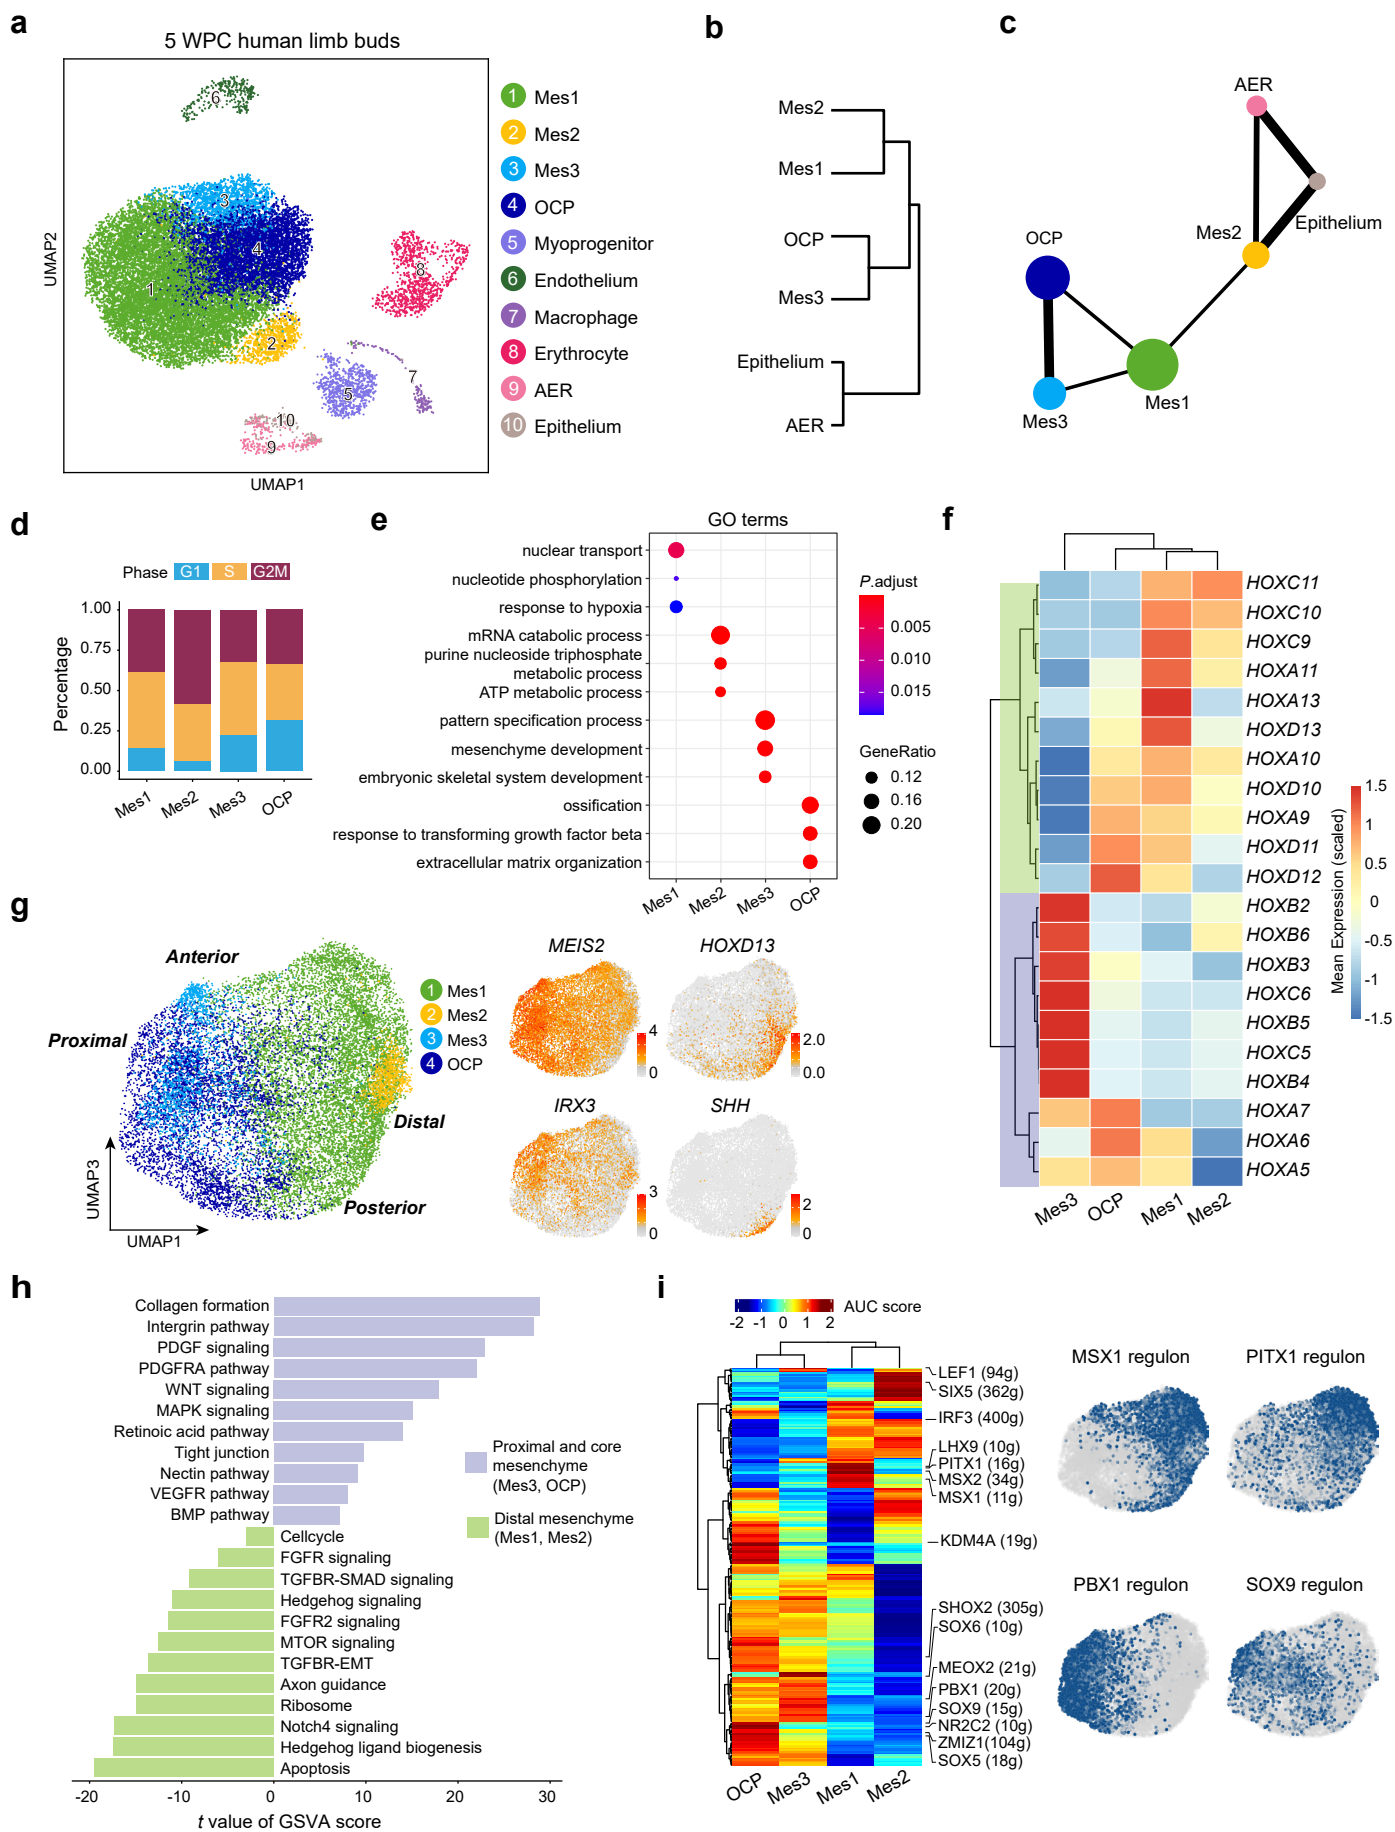

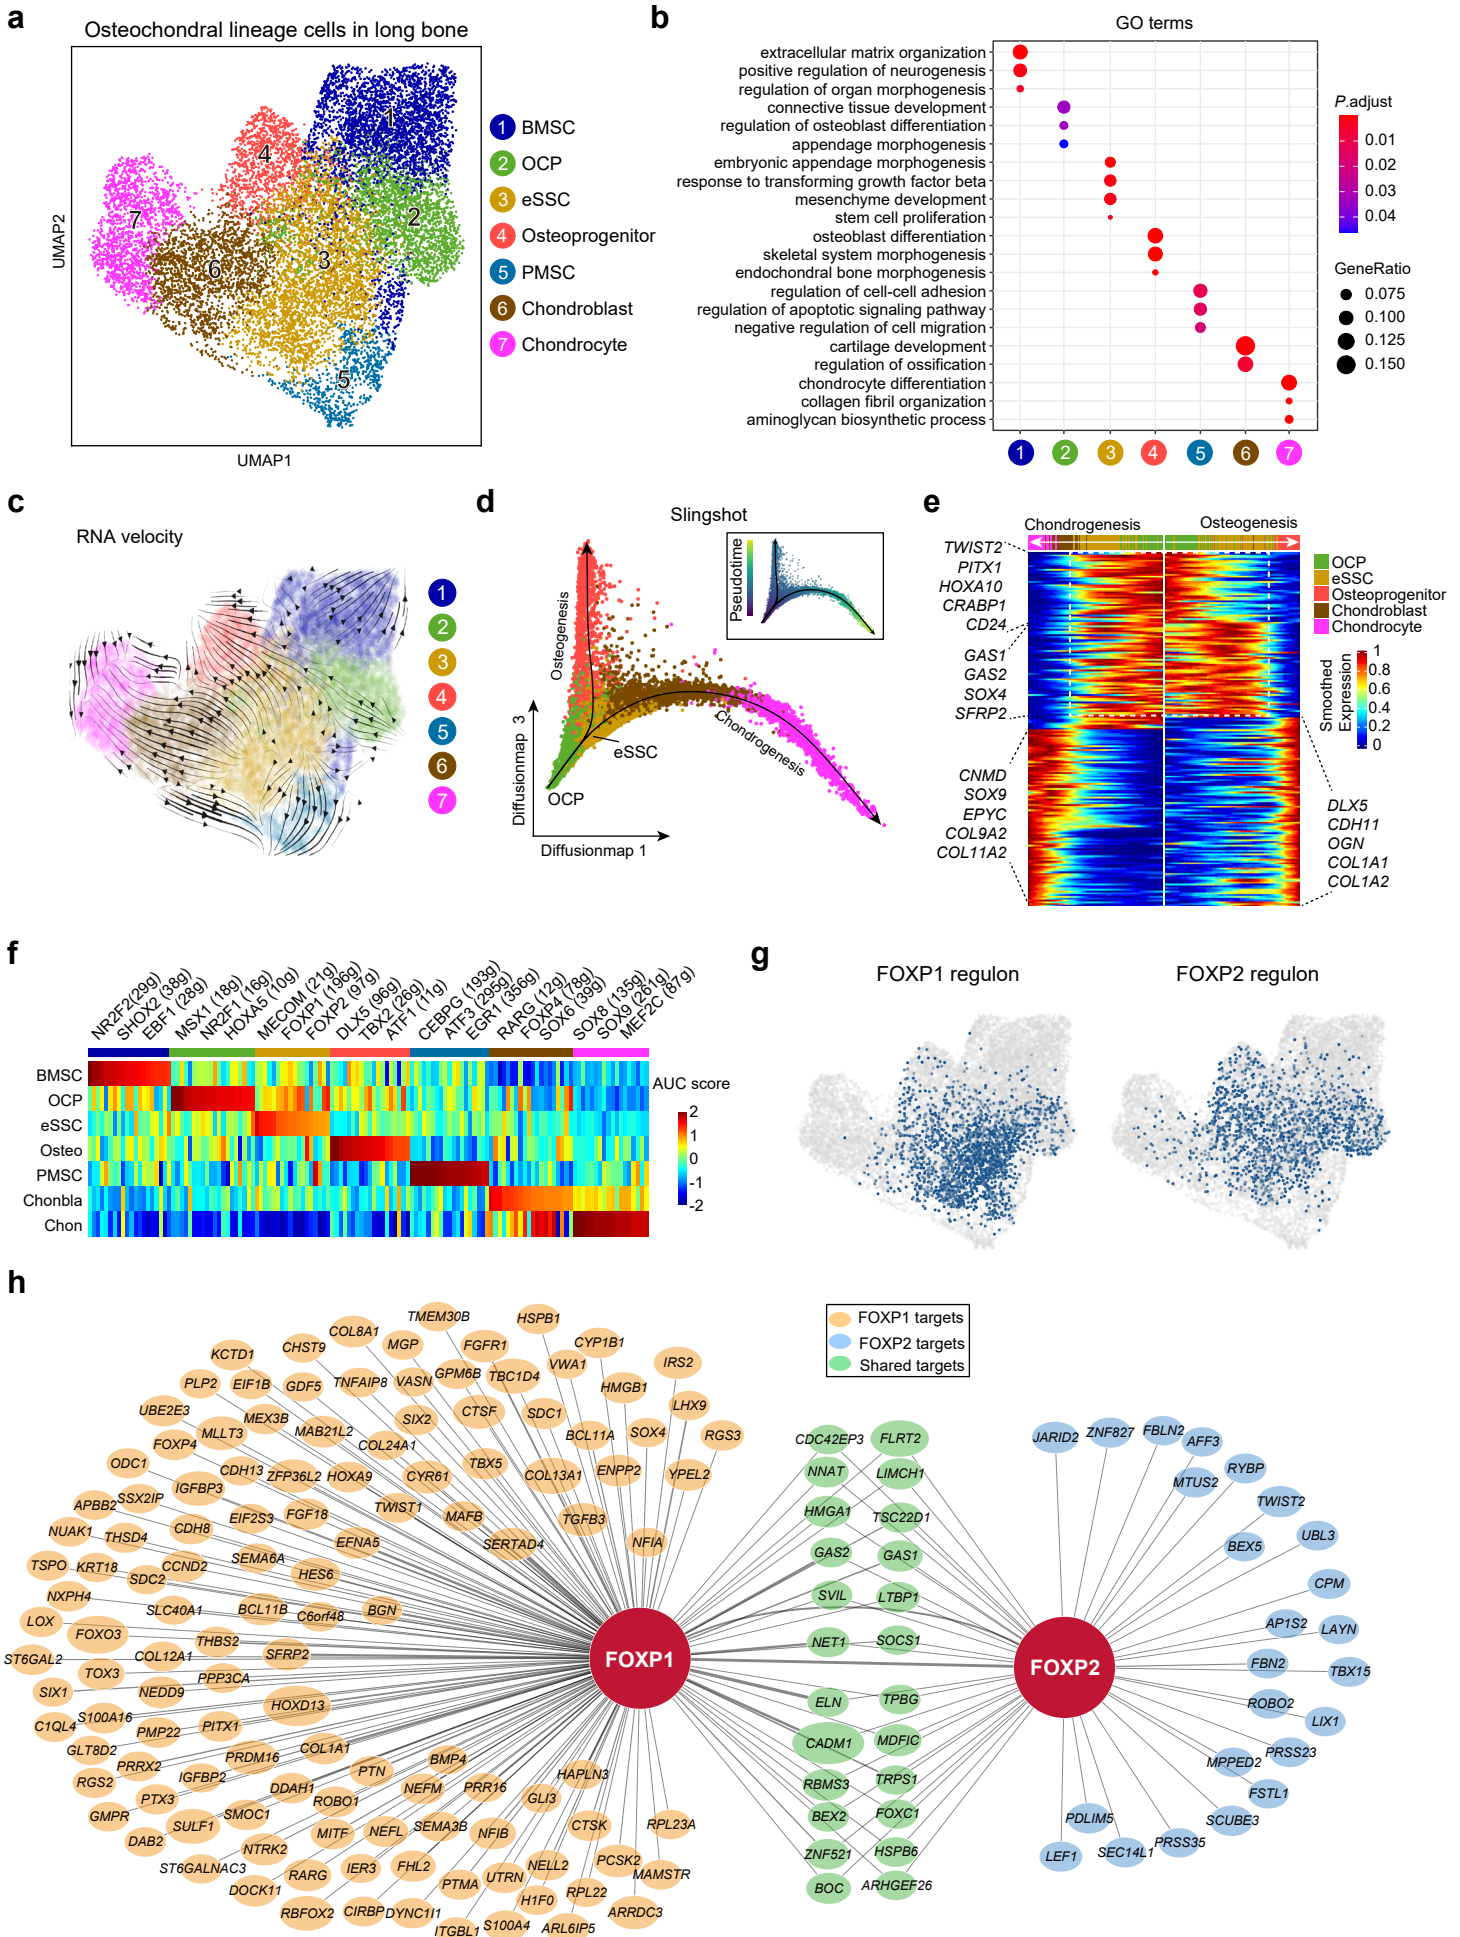

## Figure 4

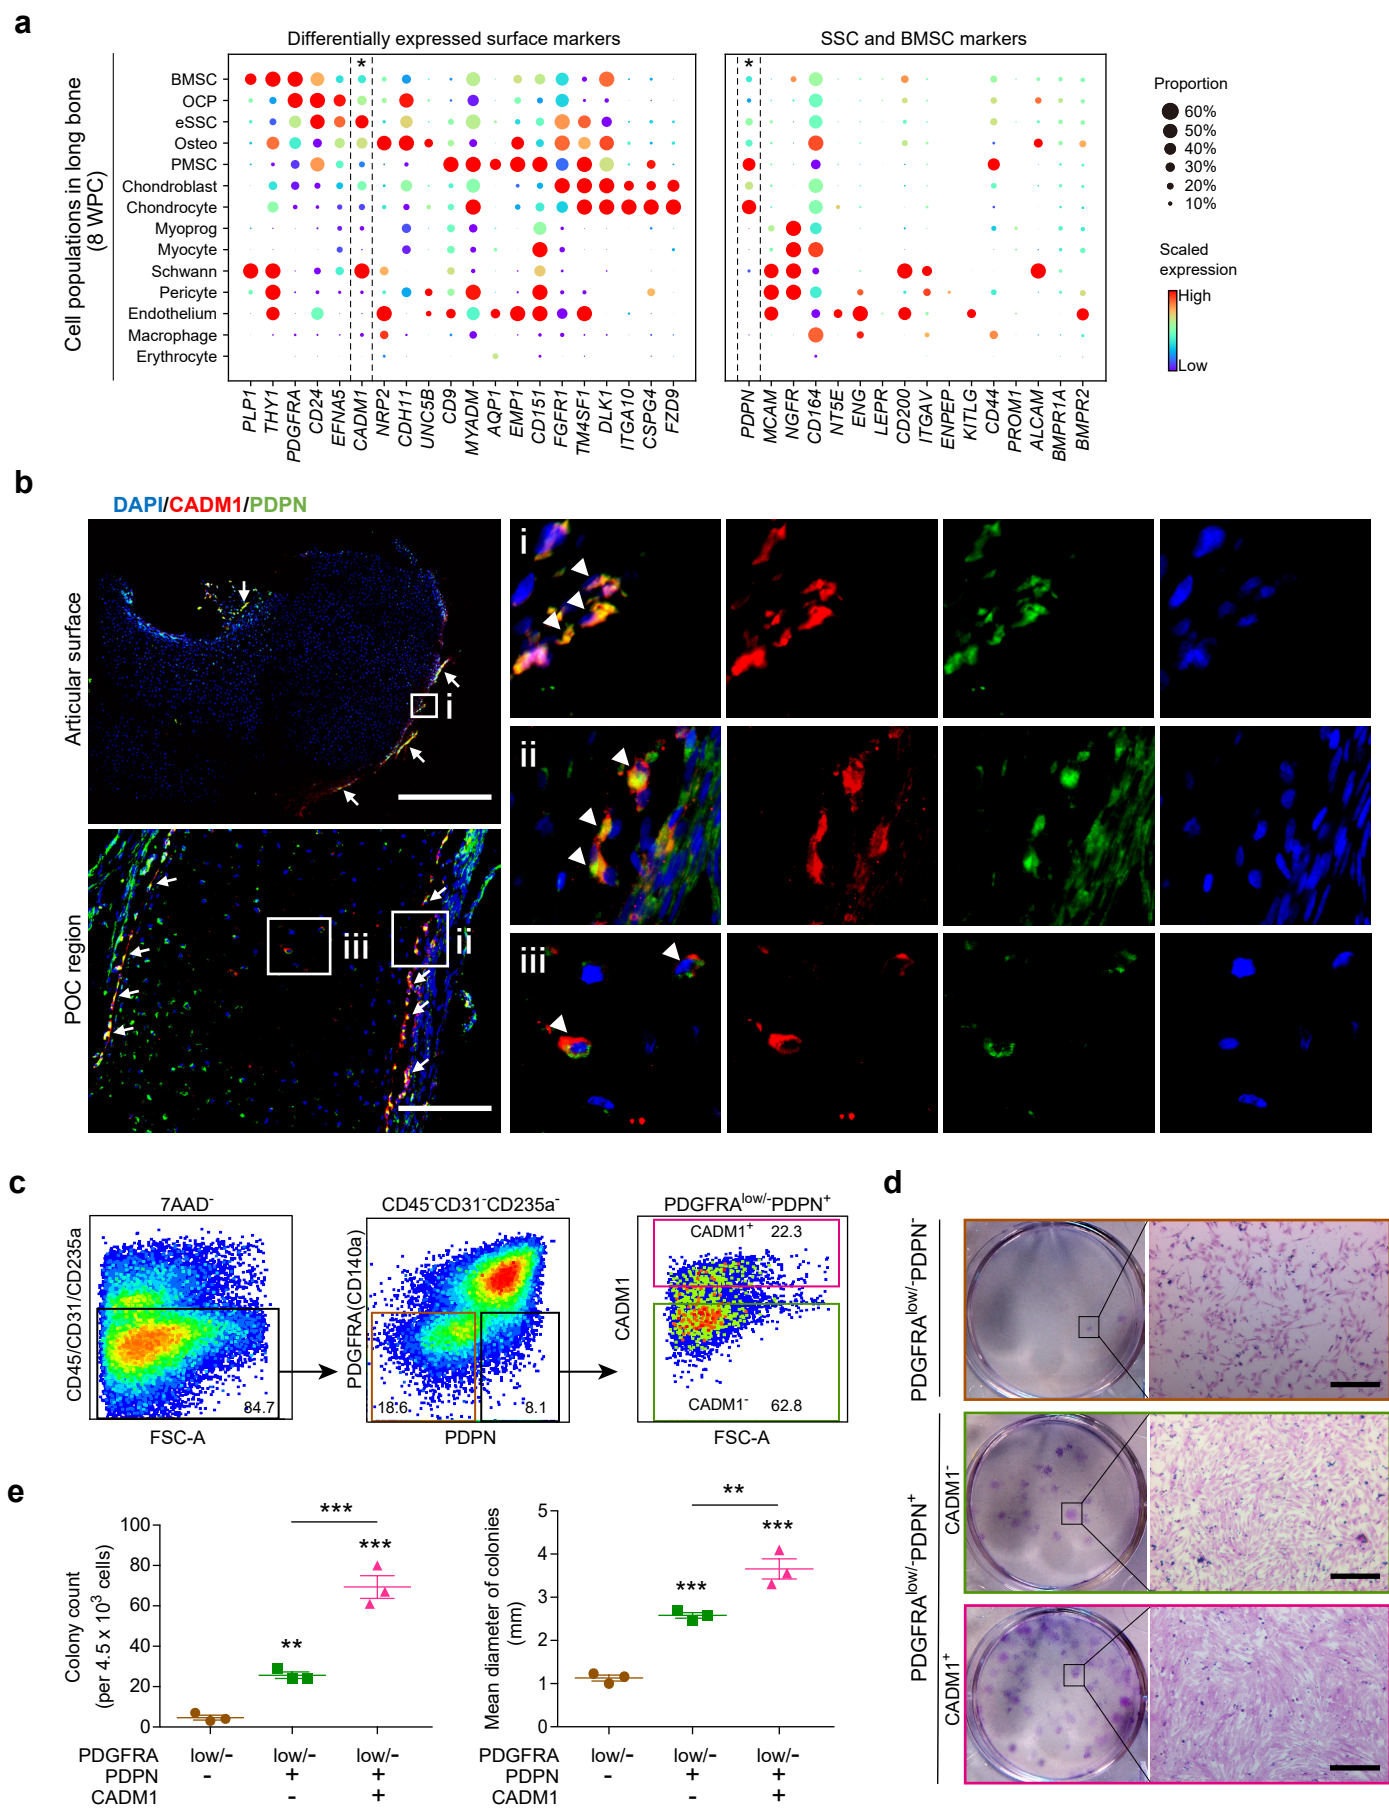

**Figure 5**

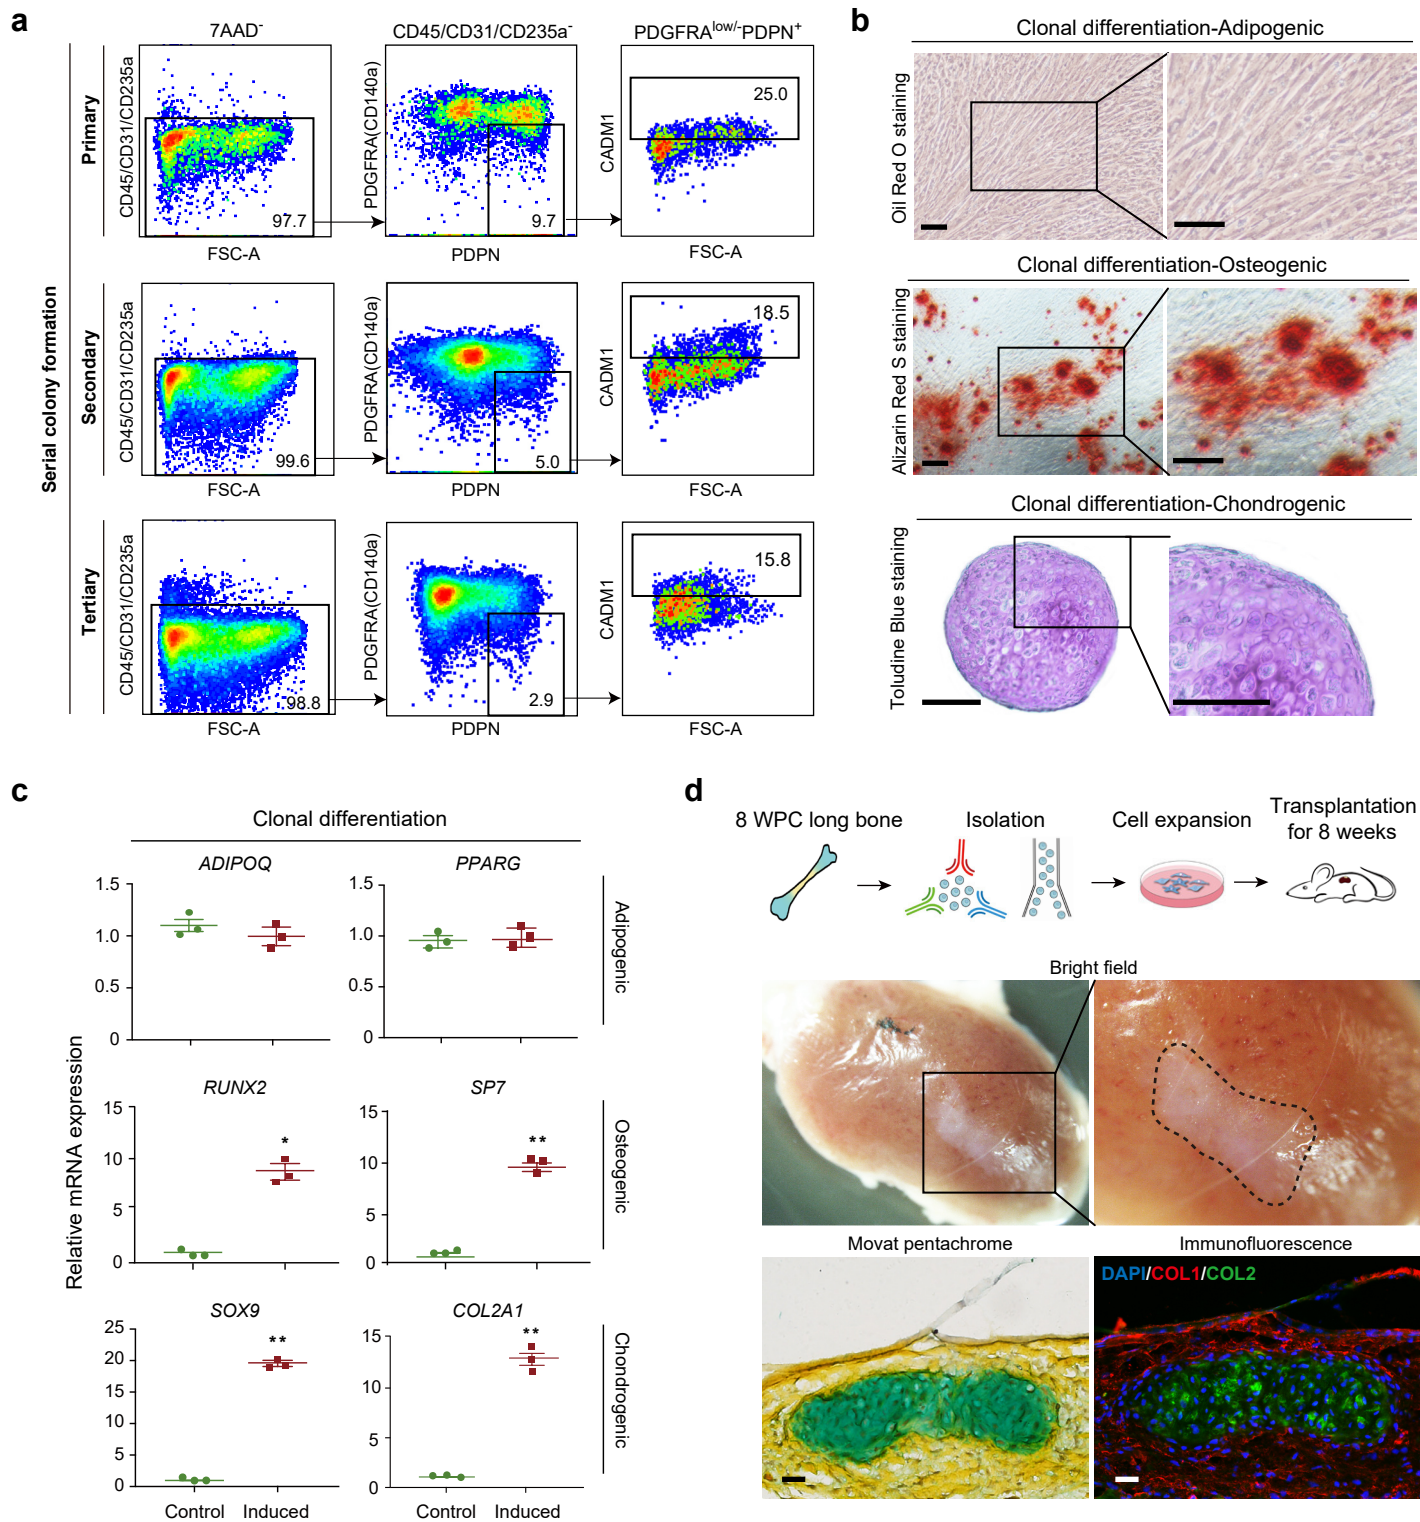

**Figure 6**

bioRxiv preprint doi: <https://doi.org/10.1101/2020.12.22.423948>; this version posted December 22, 2020. The copyright holder for this preprint (which was not certified by peer review) is the author/funder, who has granted bioRxiv a license to display the preprint in perpetuity. It is made available under aCC-BY-NC-ND 4.0 International license.

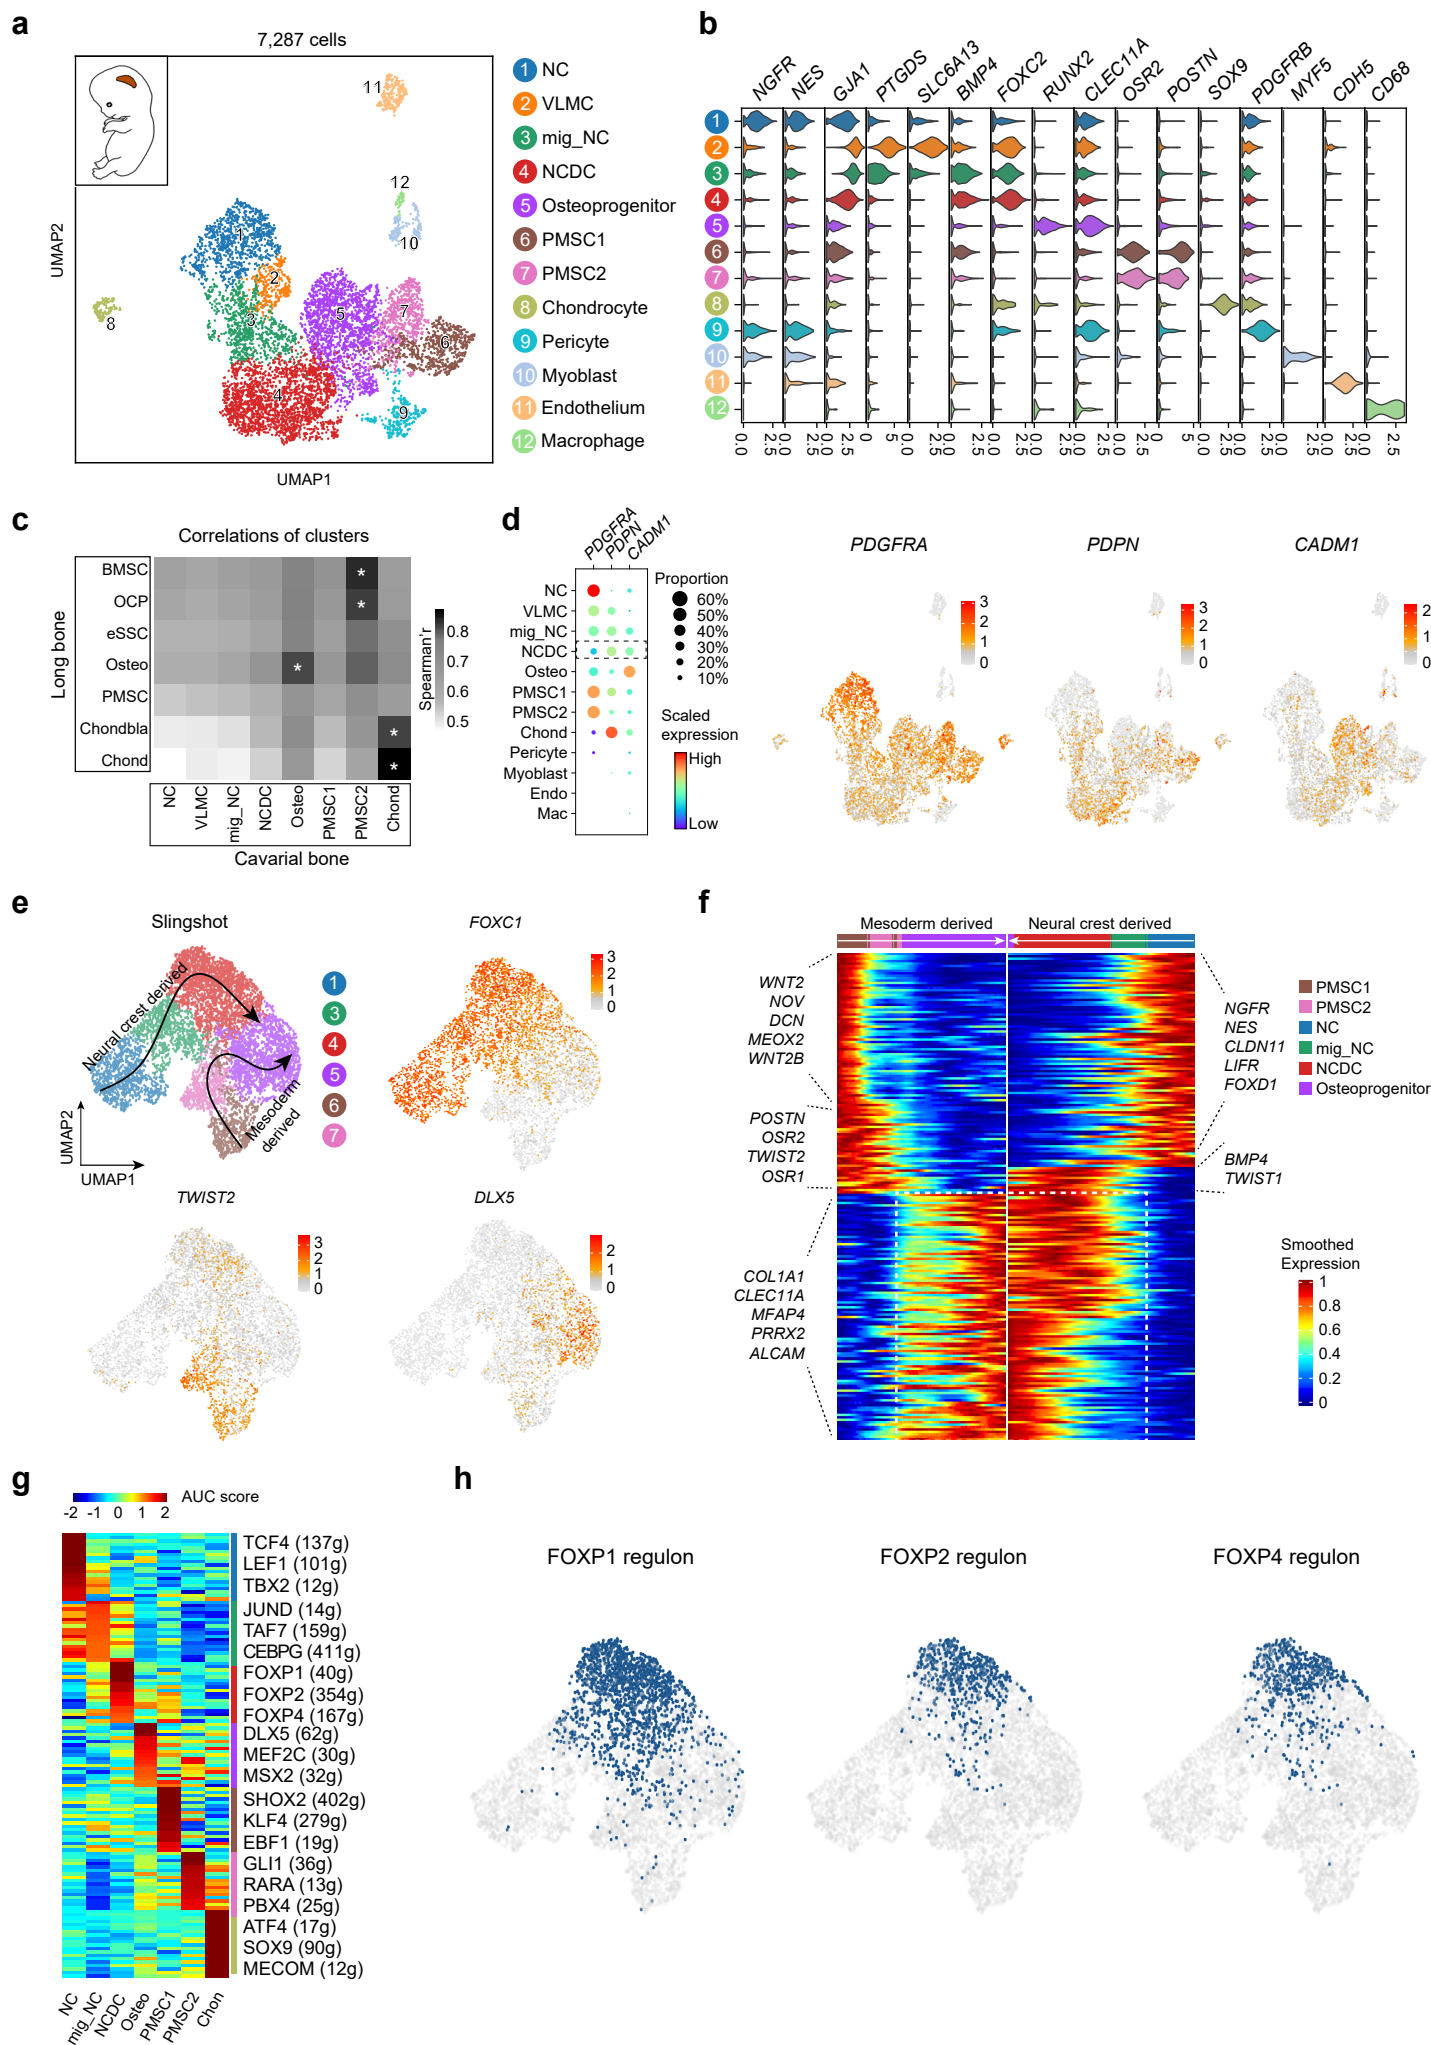

**Figure S1**

**a**

| Stage              | Sample       | Dpf <sup>b</sup> | Tissue                        | Strategy          | Gender | Cell Number | Doublets | Cell Number (QC <sup>c</sup> ) | Gene number | UMI number | Perc.mito <sup>d</sup> |
|--------------------|--------------|------------------|-------------------------------|-------------------|--------|-------------|----------|--------------------------------|-------------|------------|------------------------|
| 5 WPC <sup>a</sup> | Embryo 1     | 30               | Limb bud                      | scRNA-seq         | Male   | 6,248       | 315      | 5,300                          | 3,443       | 13,741     | 2.5%                   |
|                    | Embryo 2     | 36               | Limb bud                      | scRNA-seq         | Female | 8,675       | 606      | 7,351                          | 3,508       | 13,079     | 2.8%                   |
|                    | Embryo 3     | 36               | Limb bud                      | scRNA-seq         | Male   | 9,119       | 670      | 7,239                          | 3,119       | 10,759     | 2.2%                   |
| 8 WPC              | Embryo 4     | 49               | Long bone                     | scRNA-seq         | Female | 4,786       | 185      | 4,375                          | 2,253       | 7,159      | 1.5%                   |
|                    | Embryo 5     | 55               | Long bone                     | scRNA-seq         | Male   | 6,645       | 356      | 5,745                          | 2,386       | 8,760      | 1.9%                   |
|                    | Embryo 6     | 55               | Long bone                     | scRNA-seq         | Female | 6,431       | 334      | 5,560                          | 1,955       | 6,247      | 2.3%                   |
|                    | Embryo 7-9   | 55               | Long bone                     | Nonclonal culture | Total  | 45,690      |          | 35,570                         |             |            |                        |
|                    | Embryo 10-11 | 55               | Long bone                     | Clonal culture    |        |             |          |                                |             |            |                        |
|                    | Embryo 12    | 56               | Long bone                     | Clonal culture    |        |             |          |                                |             |            |                        |
|                    | Embryo 13    | 56               | Long bone                     | Transplant        |        |             |          |                                |             |            |                        |
|                    | Embryo 14    | 56               | Long bone                     | Transplant        |        |             |          |                                |             |            |                        |
|                    | Embryo 15    | 56               | Long bone                     | Transplant        |        |             |          |                                |             |            |                        |
|                    | Embryo 16-17 | 36               | Limb bud                      | H&E staining      |        |             |          |                                |             |            |                        |
| Embryo 18-19       | 56           | Long bone        | H&E, IF <sup>e</sup> staining |                   |        |             |          |                                |             |            |                        |

<sup>a</sup>WPC: weeks post conception; <sup>b</sup>Dpf: days post fertilization; <sup>c</sup>QC: quality control; <sup>d</sup>Perc.mito: percentage of mitochondrial genes  
<sup>e</sup>IF: immunofluorescence

**b**

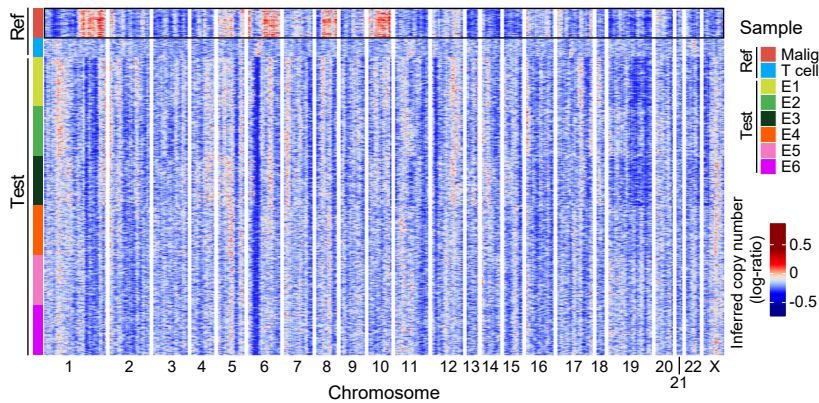

**c**

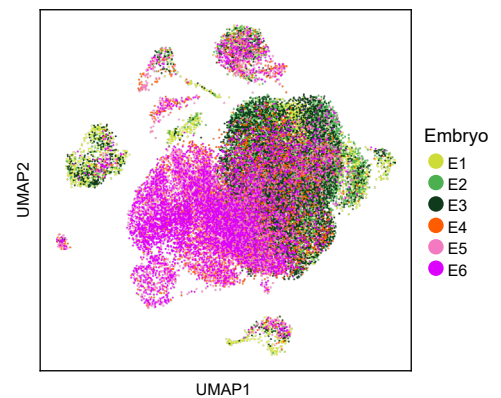

**d**

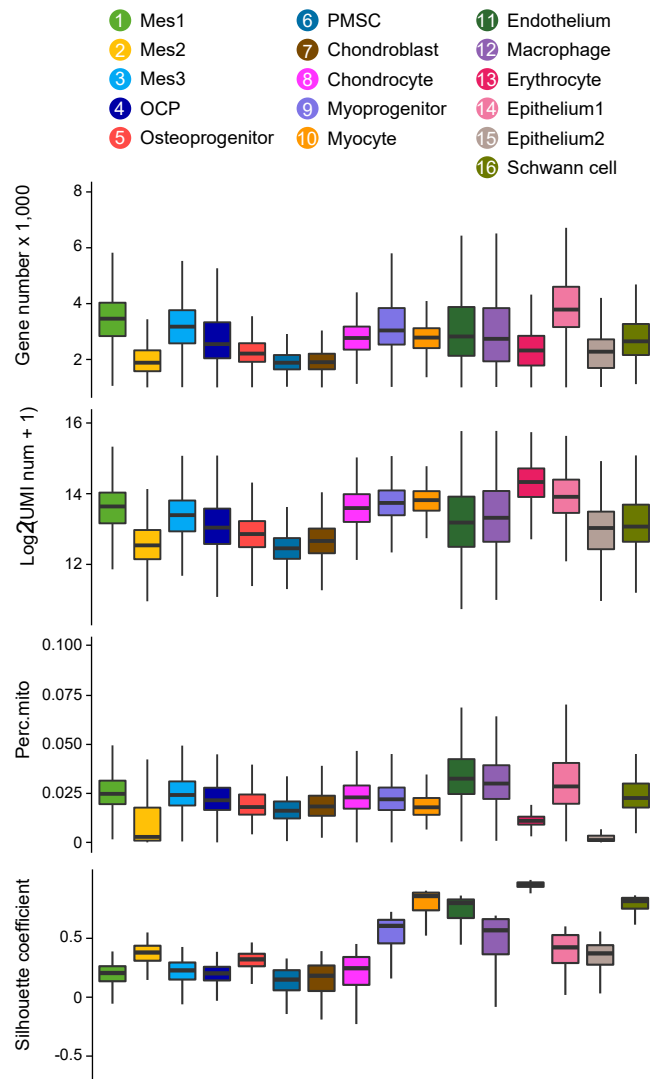

**e**

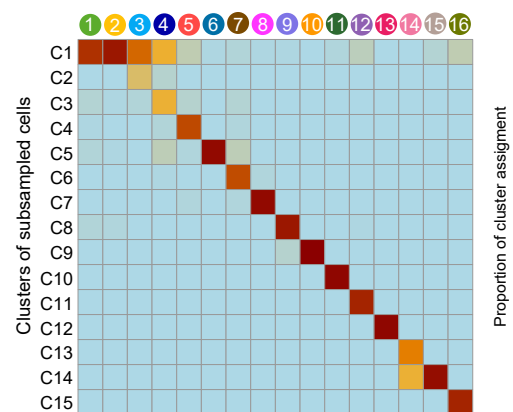

**f**

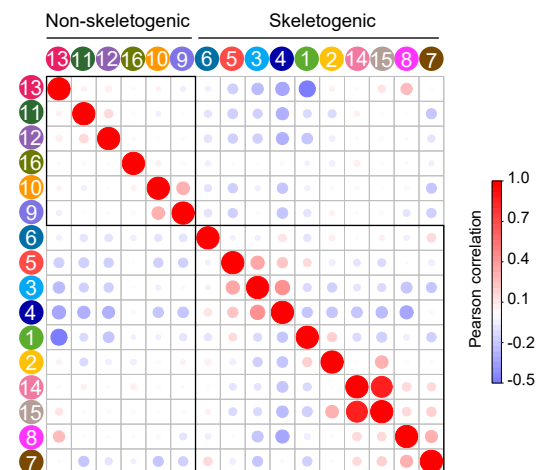

**Supplementary Figure 1.** Sample information and data quality control

**a**, Table summary of human embryonic limb bud and long bone samples and detailed scRNA-seq information. **b**, CNV scores inferred from transcriptomes of tumor cells, normal T cells (reference cell type) and 100 randomly selected cells from the 6 embryos analyzed by scRNA-seq (test cells). Red: amplifications; Blue: deletions. **c**, UMAP visualization of the 6 embryos analyzed by scRNA-seq. These included 5 WPC limb buds (E1-3) and 8 WPC long bones (E4-6). **d**, Boxplot showing the number of detected genes, log-transformed UMI counts, percentage of mitochondrial genes and Silhouette coefficient for each subset. **e**, Assessment of the 15 clusters from 6,000 randomly subsampled cells (1000 cells from each embryo) to the 16 subsets annotated in Fig. 1c. **f**, Pearson correlation analysis showing the relationship among the 16 subsets. Hierarchical clustering according to Pearson correlation distinguished skeletogenic (clusters 1-8, 14, 15) and non-skeletogenic subsets (clusters 9-13 and 16).



**Figure S2**

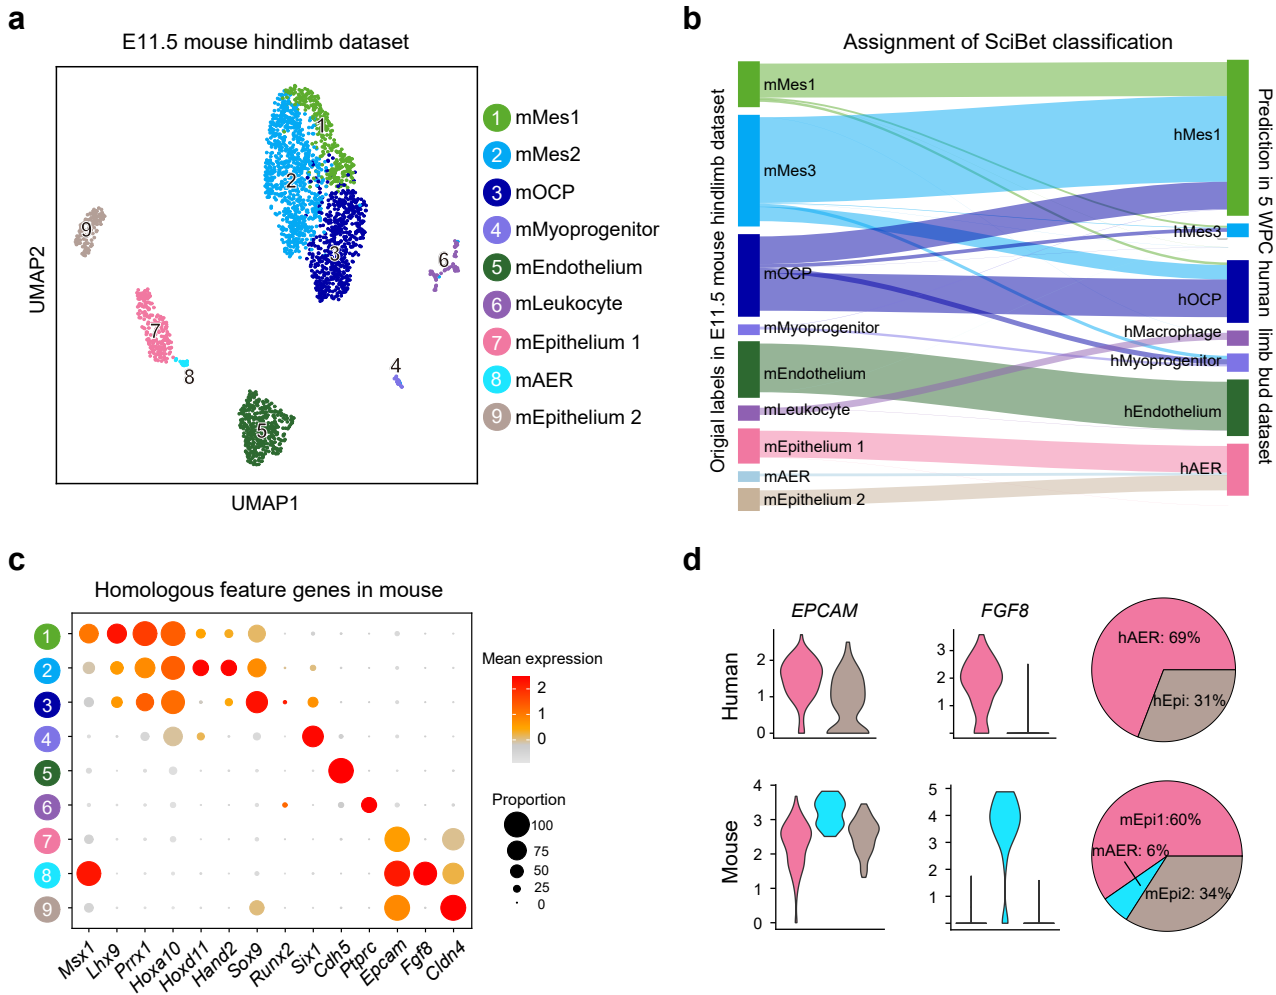

**Supplementary Figure 2.** Characterization of E11.5 mouse hindlimb bud mesenchyme and epithelium. **a**, UMAP visualization of 9 cell subsets in E11.5 mouse hindlimb bud dataset. Expression matrix was re-processed and cells were clustered according to the expression of homologous feature genes in human limb bud. **b**, Sankey diagram for assigning E11.5 mouse hindlimb bud subsets to 5 WPC human limb bud datasets. **c**, Dot plots of mean expression of homologous feature genes in E11.5 mouse hindlimb bud subsets. **d**, Violin plots (left) showing the gene expression of EPCAM and FGF8 in human and mouse epithelial subsets. Pie charts (right) showing the proportions of each epithelial subset.

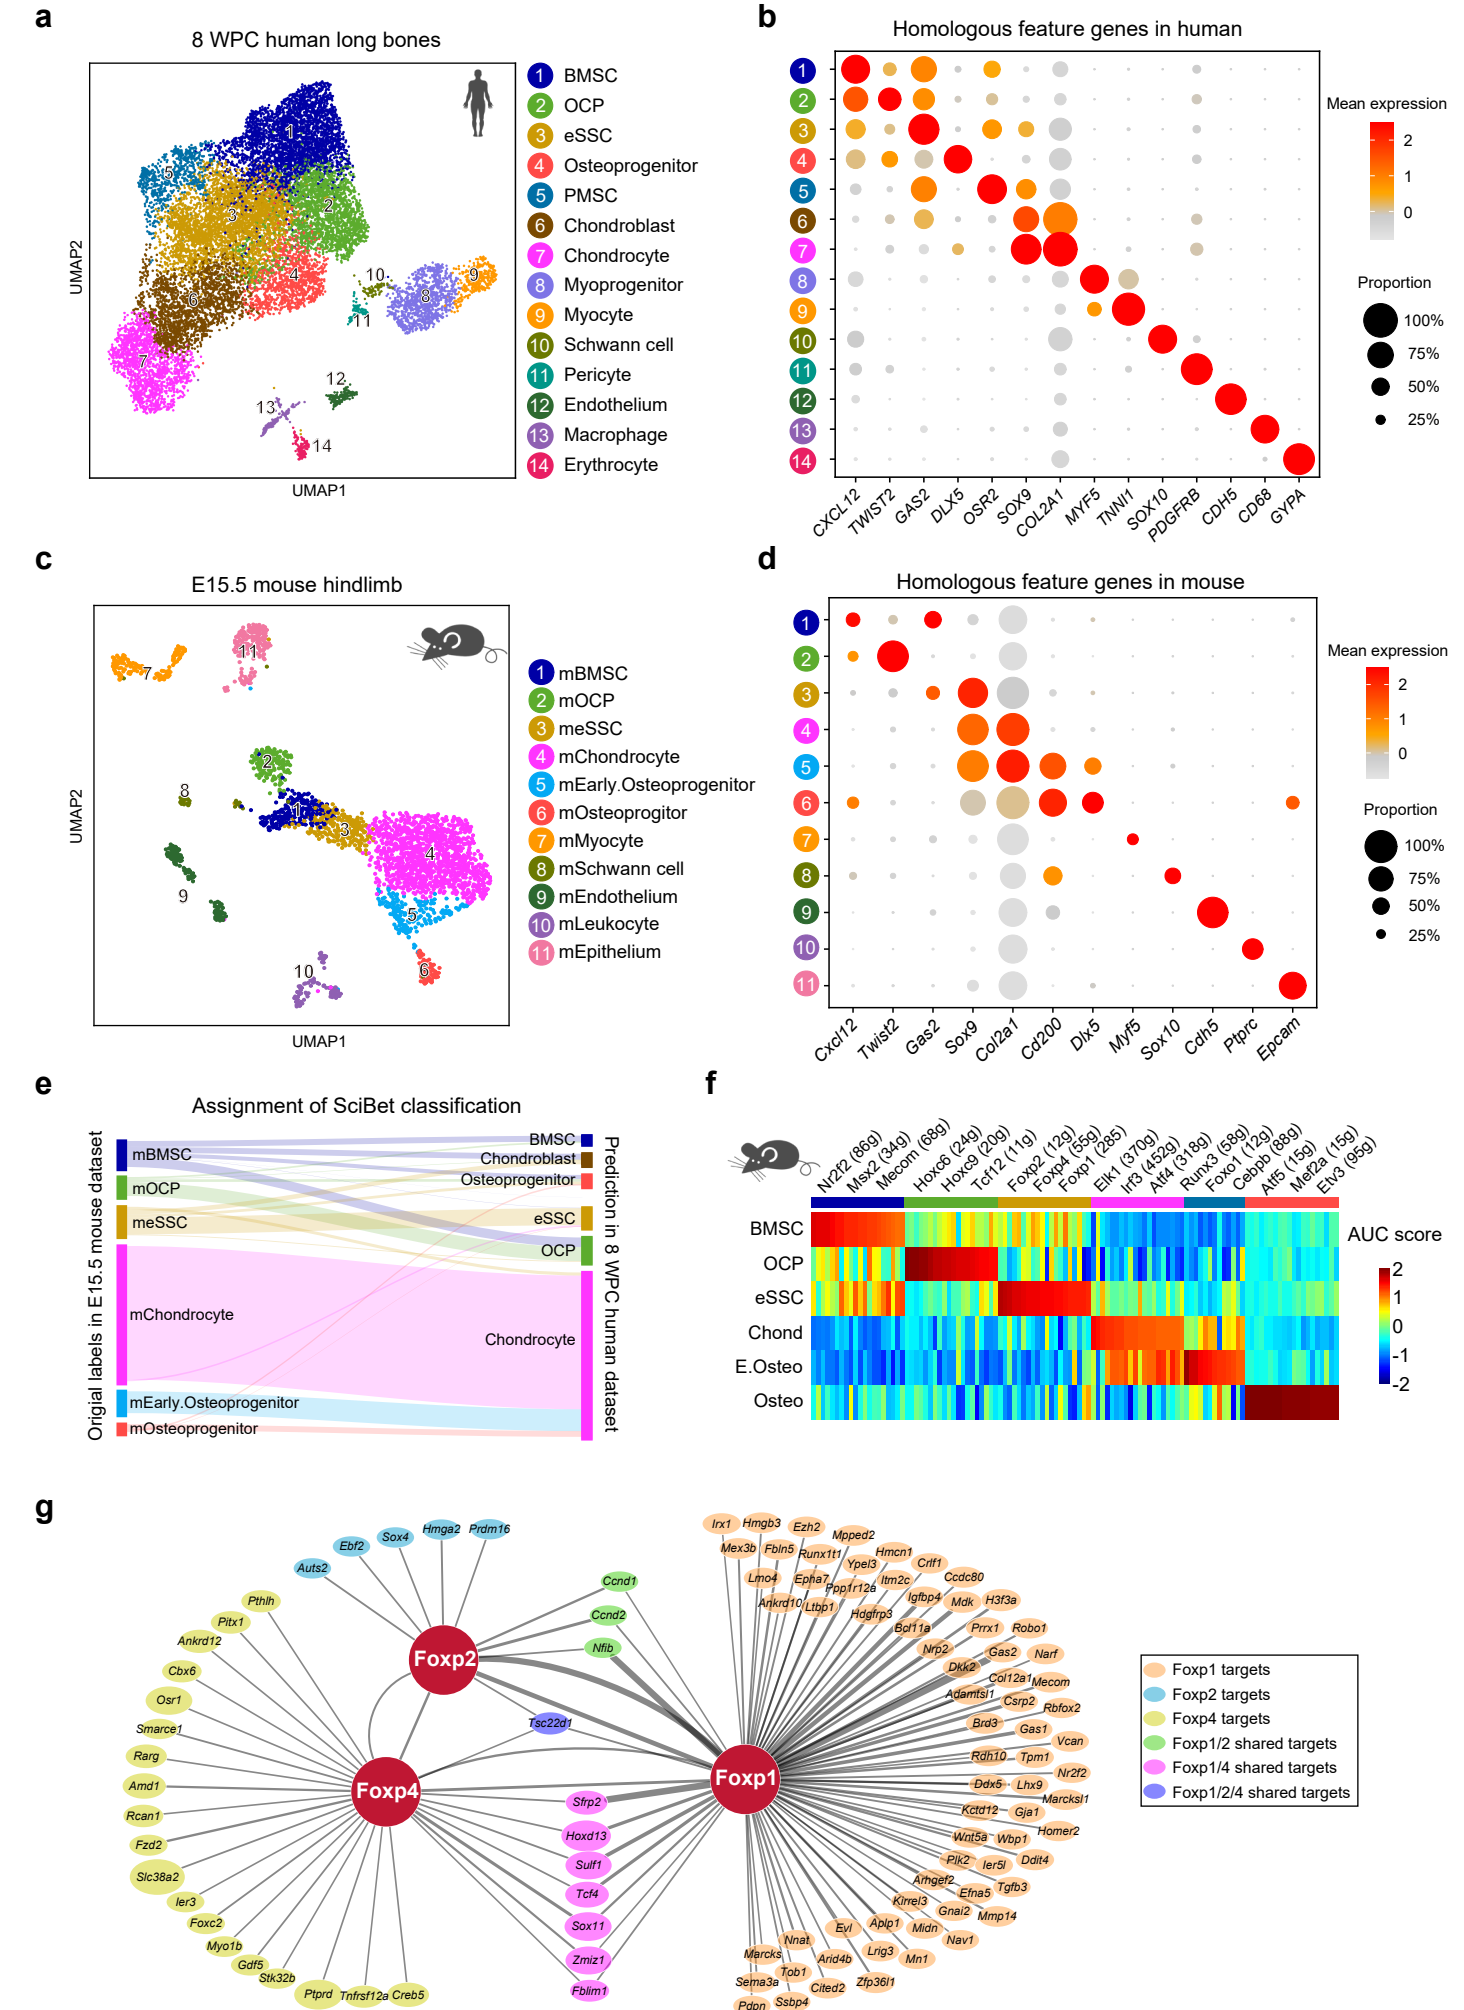

**Supplementary Figure 3.** Cross-species comparison between human and mouse embryonic long bones during POC formation. **a**, UMAP plot of the 14 subsets in 8 WPC human long bones. **b**, Dot plots showing the expression of human homologous feature genes in the 14 subsets indicated in **(a)**. **c**, UMAP plot of the 11 subsets in re-processed E15.5 mouse hindlimb dataset. **d**, Dot plots showing the expression of mouse homologous feature genes in the 11 mouse hindlimb subsets indicated in **(c)**. **e**, Sankey diagram for assigning mouse E15.5 hindlimb datasets to human 8 WPC long bone datasets. **f**, Heatmap showing the AUC scores of regulons enriched in mouse OCLC subsets. Z-score (column scaling) was calculated. Representative regulons were shown on the right. **g**, The *Foxp1/2/4* regulon networks in mouse OCLC subsets. Lines thickness indicated the level of GENIE3 weights. Dot size indicated the number of enriched TF motifs.

**Figure S4**

**a**

Transcript-averaged cell scoring (TACS)

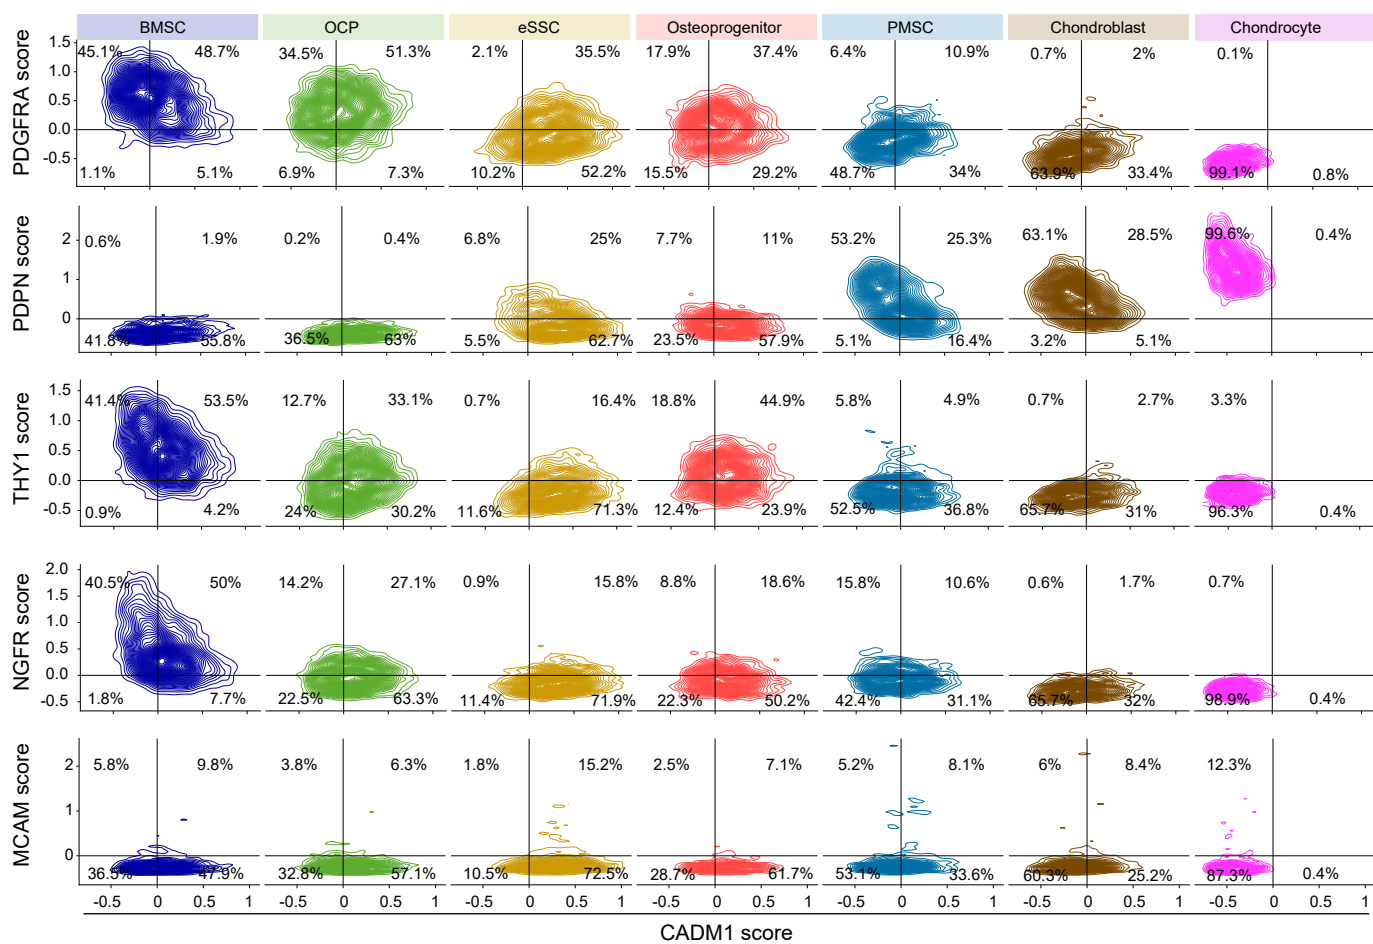

**b**

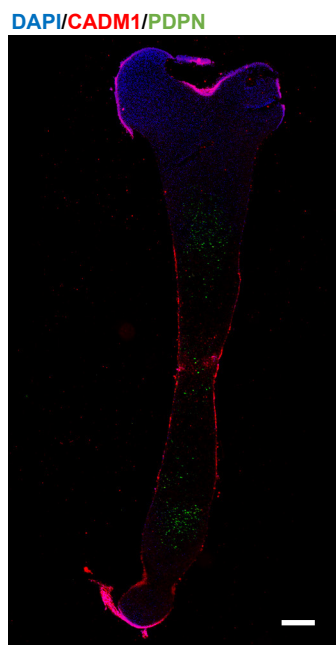

**c**

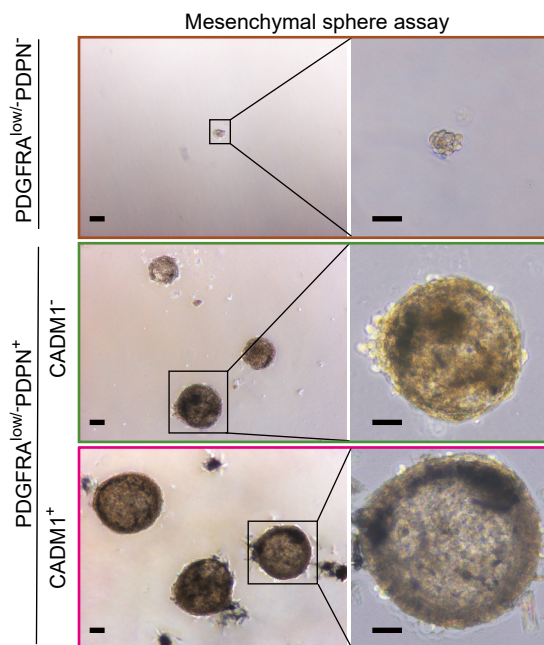

**d**

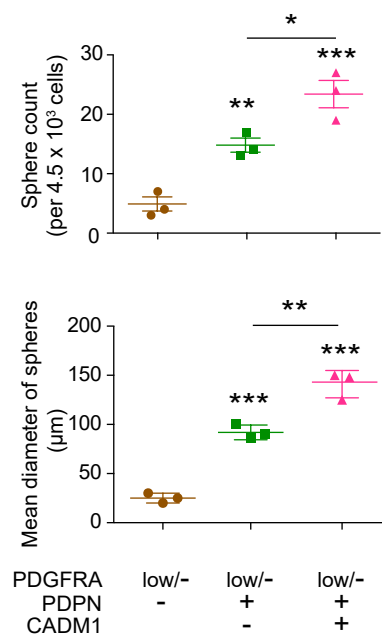

**Supplementary Figure 4.** Further in silico and functional analyses of eSSCs. **a**, TACS plots showing the distribution of each OCLC subset between indicated surface marker pairs. Contours outlined regions of increasingly higher cell density. Cell frequencies were shown on the plots. **b**, Representative immunofluorescent image of 8 WPC human femur section stained with DAPI (blue), CADM1 (red) and PDPN (green). **c**, Representative images showing the mesenchymal spheres formed by the 3 populations sorted as in Fig. 4c (left), with magnified views (right). Scale bars: 25  $\mu\text{m}$ . **d**, Quantification of the number (top) and mean diameter (bottom) of mesenchymal spheres. The statistical significance of differences was determined using one-way ANOVA with multiple comparison tests (LSD). \*  $P < 0.05$ ; \*\*  $P < 0.01$ ; \*\*\*  $P < 0.001$ . Error bars indicated SEM.

**Figure S5**

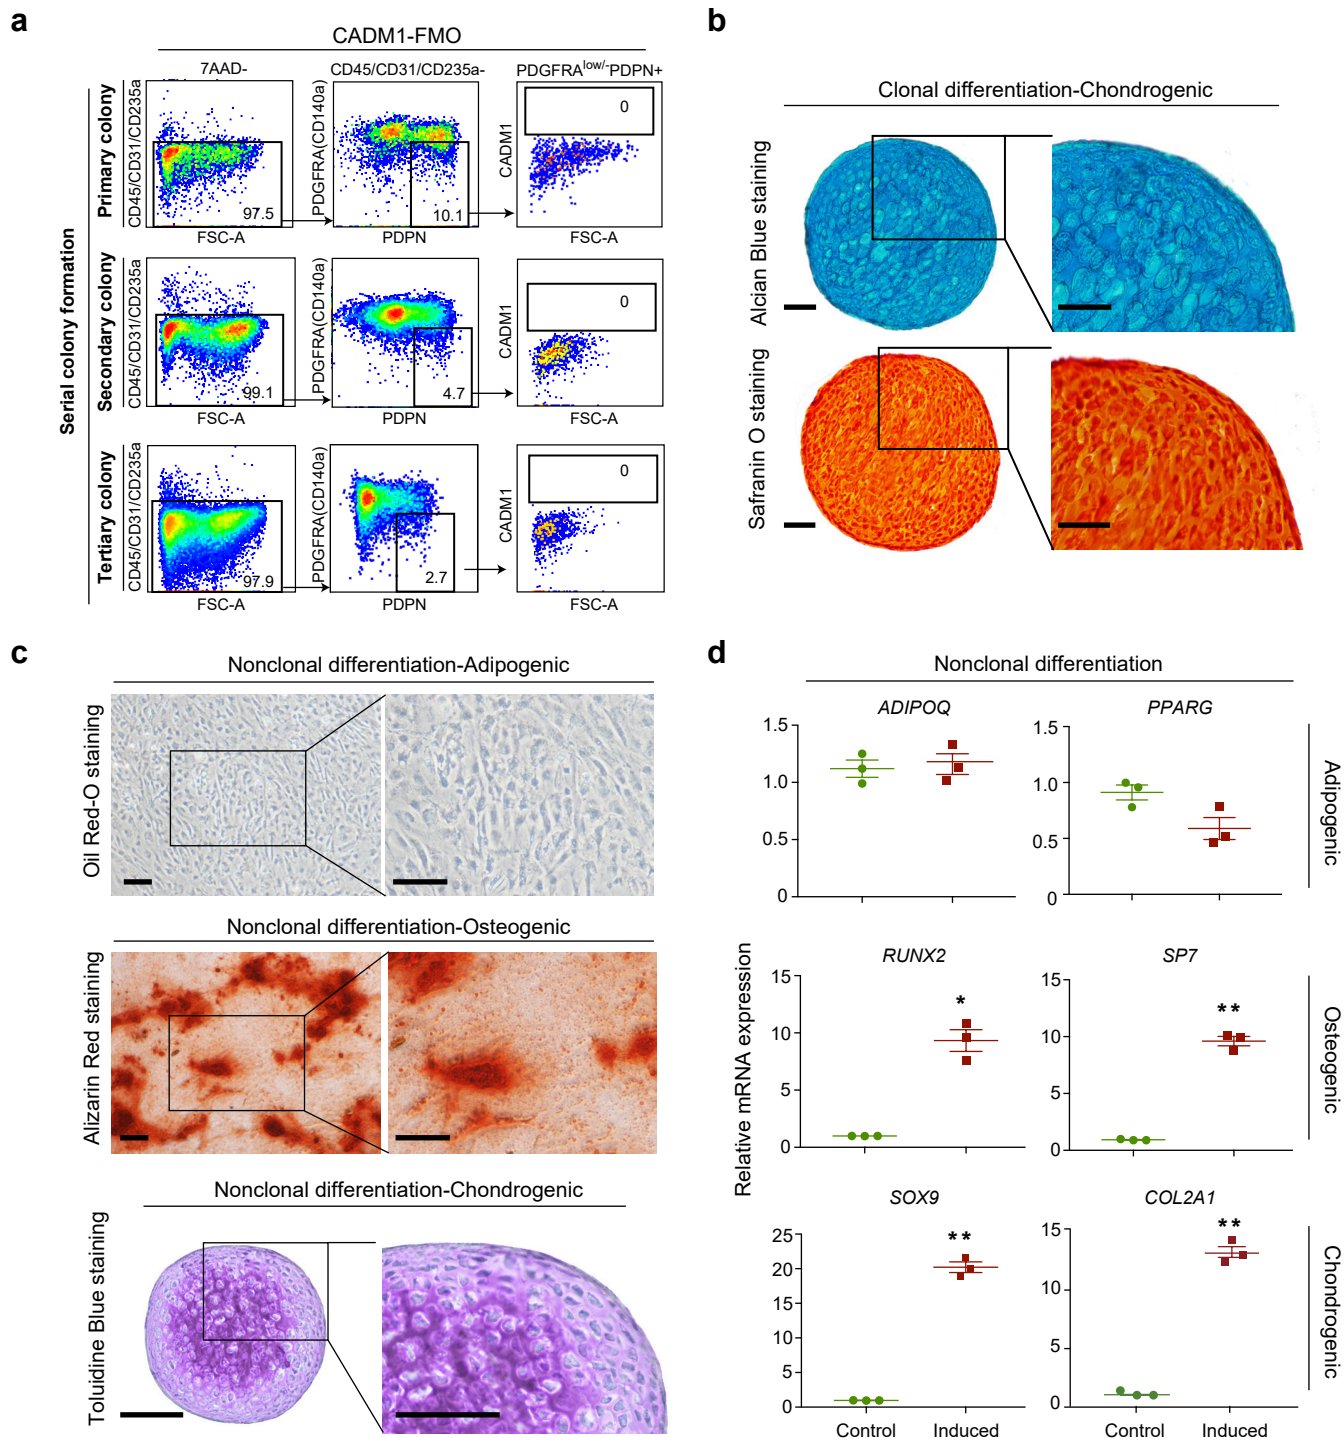

**Supplementary Figure 5.** FMO controls and in vitro differentiation of eSSCs. **a**, Fluorescence-minus-one (FMO) controls for eSSC gating strategy in serial colony formation assay (Fig. 5a). **b**, Representative alcian blue (top) and safranin O staining (bottom) after chondrogenic differentiation of clonally expanded eSSCs (PDGFRA<sup>low</sup>/PDPN<sup>+</sup>CADM1<sup>+</sup>). Magnified images of the boxed areas were shown on the right. Scale bars: 100  $\mu$ m. **c**, Representative oil red O (top), alizarin red (middle) and toluidine blue (bottom) staining after adipogenic, osteogenic and chondrogenic differentiation of nonclonally expanded eSSCs (PDGFRA<sup>low</sup>/PDPN<sup>+</sup>CADM1<sup>+</sup>). Magnified images of the boxed areas were shown on the right. Scale bars: 200  $\mu$ m. **d**, qPCR analyses of adipogenic, osteogenic and chondrogenic marker genes in nonclonally expanded eSSCs before and after trilineage differentiation in vitro. The statistical significance of differences was determined using Wilcoxon signed rank test. \*  $P < 0.05$ ; \*\*  $P < 0.01$ . Error bars indicated SEM.

## Figure S6

**a**

| Stage | Sample       | Dpf <sup>a</sup> | Tissue        | Strategy                 | Gender | Cell Number | Doublets | Cell Number (QC <sup>b</sup> ) | Gene number | UMI number | Perc.mito <sup>c</sup> |
|-------|--------------|------------------|---------------|--------------------------|--------|-------------|----------|--------------------------------|-------------|------------|------------------------|
| 8 WPC | Embryo 20    | 56               | Cavariar bone | scRNA-seq                | Male   | 3,786       | 338      | 2,932                          | 3,126       | 14,860     | 2.7%                   |
|       | Embryo 21    |                  |               |                          |        | 6,476       | 116      | 4,355                          | 4,330       | 17,899     | 6.5%                   |
|       | Embryo 22-23 | 56               | Cavariar bone | IF <sup>e</sup> staining | Total  | 10,262      |          | 7,287                          |             |            |                        |

<sup>a</sup>WPC: weeks post conception; <sup>b</sup>Dpf: days post fertilization; <sup>c</sup>QC: quality control; <sup>d</sup>Perc.mito: percentage of mitochondrial genes; <sup>e</sup>IF: immunofluorescence

**b**

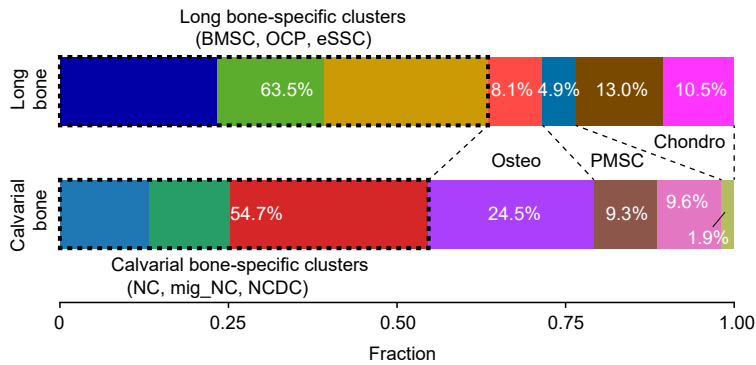

**c**

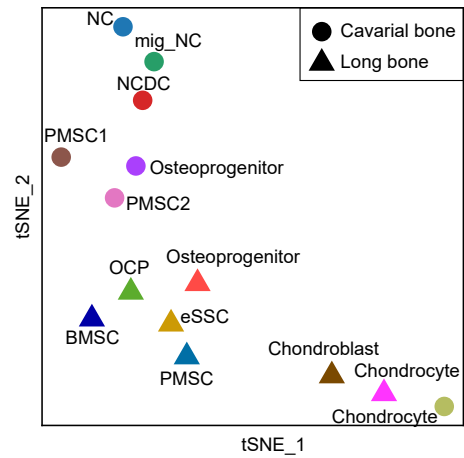

**d**

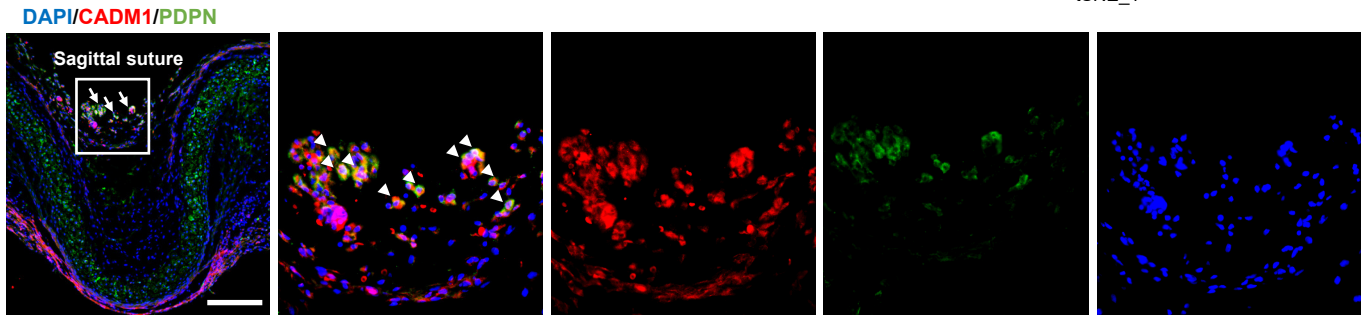

**e**

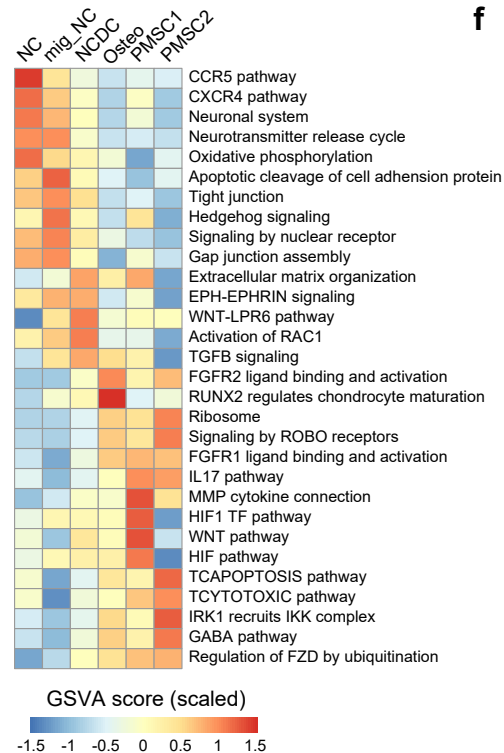

**f**

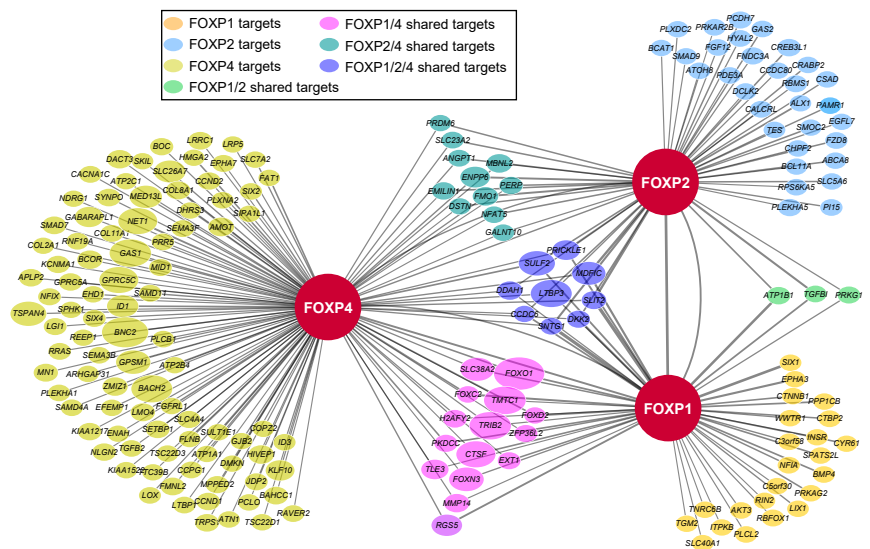

**Supplementary Figure 6.** Further characterizations of human embryonic calvaria. **a**, Table summary of the 8 WPC human embryonic calvarial bone samples for scRNA-seq and immunostaining. **b**, Stacked bar charts comparing the distribution of 8 WPC long bone and calvarial subsets. Dashed boxes indicated skeletal site-specific clusters. The three shared clusters (osteoprogenitor, PMSC and chondrocyte) were highlighted by dash lines. **c**, t-distributed stochastic neighbor embedding(t-SNE) projection of indicated subsets from long bones and calvarial bones to compare the transcriptomic similarities at the pseudo-bulk level. **d**, Immunofluorescent images of PDPN+CADM1+ cells in 8 WPC human calvarial bones. Overview of the calvarial region surrounding sagittal suture was shown on the left. PDPN+CADM1+ cells (arrows) were found in the outer layer of sagittal mesenchyme. Arrow heads indicated enlarged PDPN+CADM1+ cells. Merged and single-channel images of DAPI (blue), CADM1 (red) and PDPN (green) were shown. Scale bars: 200  $\mu\text{m}$ . **e**, Heatmap showing pathways differentially enriched in calvarial bone subsets by GSVA, colored by scaled mean of GSVA scores. **f**, The FOXP1/2/4 regulon network in 8 WPC human calvarial bone subsets. Line thickness indicated the level of GENIE3 weights. Dot size indicated the number of enriched TF-motif.
